# Supplementary material
Source: PubMed Central journal article supplement (PMC7613712)
Supplement: EMS153168-supplement-Supplementary_Tables.pdf [file EMS153168-supplement-Supplementary_Tables.pdf]

## SUPPLEMENTARY TABLES

**Supplementary Table 1.** Publicly available gene sets and signatures used in the study.

| <b>Name</b>                      | <b>Reference</b>                                          |
|----------------------------------|-----------------------------------------------------------|
| <b>HCC classification</b>        |                                                           |
| Sia HCC immune class             | Sia D, et al. Gastroenterology 2017;153:812-826           |
| Chiang classification            | Chiang D, et al. Cancer Res 2008;68:6779-6788             |
| Hoshida classification           | Hoshida Y, et al. Cancer Res 2009;69:7385-7392            |
| Cluster A signature              | Lee JS, et al. Hepatology 2004;40:667-76                  |
| <b>Molecular pathways</b>        |                                                           |
| TGFB late signature              | Coulouarn C, et al. Hepatology 2008: 47 2059-2067         |
| MET signature                    | Kaposi-Novak P, et al. J Clin Invest 2006;116:1582-95     |
| NOTCH signature                  | Villanueva A, et al. Gastroenterology 2012;143: 1660-1669 |
| RB1 signature                    | Bollard J, et al. Gut 2017;66: 1286-1296                  |
| <b>Antitumor immune response</b> |                                                           |
| PD1 signaling signature          | Quigley M, et al. Nat Med 2010;16:1147-51                 |
| Exhaustion signature             | Quigley M, et al. Nat Med 2010;16:1147-51                 |
| Stromal enrichment score         | Yoshihara K, et al. Nat Commun 2013;4:2612                |
| Immune enrichment score          | Yoshihara K, et al. Nat Commun 2013;4:2612                |
| IFN signature                    | Ayers M, et al. J Clin Invest 2017; 127:2930-40           |
| Immune cell infiltrate gene sets | Bindea G, et al. Immunity 2013;39:782-95                  |

**Supplementary Table 2.** Baseline characteristics of the Western cohort by sample origin.

|                                          | <b>Western Europe<br/>(n=117)</b> | <b>Western USA<br/>(n=70)*</b> | <b>P value</b> |
|------------------------------------------|-----------------------------------|--------------------------------|----------------|
| <b>Age (years)</b>                       | 67 (40-83)                        | 65 (29-91)                     | ns             |
| <b>&lt; 60 years (n, %)</b>              | 19 (16)                           | 13 (24)                        | ns             |
| <b>Gender (male, %)</b>                  | 92 (79)                           | 45 (82)                        | ns             |
| <b>Etiology:</b>                         |                                   |                                |                |
| HBV+ (n, %)                              | 23 (19)                           | 18 (26)                        | 0.001          |
| HBV/HDV+ (n, %)                          | 1 (1)                             | 2 (3)                          |                |
| HCV+ (n, %)                              | 56 (48)                           | 13 (19)                        |                |
| Non-infected (n, %)                      | 37 (32)                           | 37 (53)                        |                |
| <b>Bilirubin (mg/dL)</b>                 | 1 (0.4-3.2)                       | 0.7 (0.3-3.8)                  | ns             |
| <b>Albumin (g/L)</b>                     | 40 (25-54)                        | 42 (22-49)                     | ns             |
| <b>Platelets (10<sup>9</sup>/L)</b>      | 161 (29-493)                      | 154 (27-460)                   | ns             |
| <b>&lt; 150x10<sup>9</sup>/L (n, %)</b>  | 55 (47)                           | 26 (47)                        | ns             |
| <b>AFP &gt; 400 IU/mL (n, %)</b>         | 18 (16)                           | 8 (17)                         | ns             |
| <b>Tumor size (cm)</b>                   | 4.2 (1.5-20)                      | 4.4 (1-19)                     | ns             |
| <b>&gt; 5 cm (n, %)</b>                  | 45 (41)                           | 22 (42)                        | ns             |
| <b>BCLC stage (0-A, %)</b>               | 87 (80)                           | 35 (66)                        | ns             |
| <b>Multinodular disease (n, %)</b>       | 29 (26)                           | 13 (25)                        | ns             |
| <b>Advanced liver fibrosis (F3-4, %)</b> | 72 (88)                           | 34 (64)                        | 0.002          |
| <b>Cirrhosis (F4, %)</b>                 | 57 (70)                           | 24 (45)                        | 0.007          |
| <b>Microvascular invasion (yes, %)</b>   | 44 (38)                           | 36 (66)                        | 0.001          |
| <b>Tumor grade (G3-4, %)</b>             | 24 (27)                           | 17 (31)                        | ns             |

\*Baseline characteristics, except etiology, are missing for 15 (21%) patients in the Western USA subcohort

**Supplementary Table 3.** Viral genotypes in the Mongolian and Western cohorts.

|                          | Mongolian Cohort (N=106) | Western Cohort (N=44) | p value |
|--------------------------|--------------------------|-----------------------|---------|
| <b>HBV genotype</b>      |                          |                       |         |
| Genotype A (n, %)        | 0 (0)                    | 2 (4.5)               | <0.001  |
| Genotype B (n, %)        | 0 (0)                    | 2 (4.5)               |         |
| Genotype C (n, %)        | 0 (0)                    | 12 (27.3)             |         |
| Genotype D (n, %)‡       | 95 (89.6)                | 19 (43.2)             |         |
| Non-genotypable* (n, %)  | 11 (10.4)                | 9 (20.5)              |         |
| <b>HDV genotype</b>      |                          |                       |         |
| Genotype 1 (n, %)        | 85 (95.5)                | 1 (33.3)              | <0.001  |
| Genotype 2 (n, %)        | 0 (0)                    | 1 (33.3)              |         |
| Non-genotypable* (n, %)  | 4 (4.5)                  | 1 (33.4)              |         |
| <b>HBV mutations</b>     |                          |                       |         |
| BCP A1762T (yes, %)†     | 10 (13.7)                | 21 (60)               | <0.001  |
| BCP G1764A (yes, %)†     | 15 (20.5)                | 23 (65.7)             | <0.001  |
| Precore G1896A (yes, %)† | 21 (28.8)                | 16 (45.7)             | ns      |

HBV, hepatitis B virus; HDV, hepatitis delta virus; BCP, basal pre-core

‡2 patients showed recombinant forms of the C and D genotypes

\* non-genotypable due to technical failure

†HBV mutations were evaluated in 73 (69%) patients in the Mongolian cohort and 35 (80%) patients in the Western cohort

**Supplementary Table 4.** Baseline characteristics of HBV-infected Mongolian patients according to the 25<sup>th</sup> quartile of HBV-DNA load.

|                                            | <b>Low HBV-DNA (&lt;4 log copies/μg total DNA) (n=30)</b> | <b>High HBV-DNA (≥4 log copies/μg total DNA) (n=75)</b> | <b>p value</b> |
|--------------------------------------------|-----------------------------------------------------------|---------------------------------------------------------|----------------|
| <b>Age (years)</b>                         | 57.7 (18-71.3)                                            | 56,2 (41.1- 75.8)                                       | ns             |
| <b>Gender (male, %)<sup>‡</sup></b>        | 15 (51.7)                                                 | 37 (52.1)                                               | ns             |
| <b>Etiology</b>                            |                                                           |                                                         |                |
| <b>HBV (n, %)</b>                          | 8 (26.7)                                                  | 7 (9.3)                                                 | ns             |
| <b>HBV/HDV (n, %)</b>                      | 20 (66.7)                                                 | 56 (74.7)                                               |                |
| <b>HBV/HCV/HDV (n, %)</b>                  | 1 (3.3)                                                   | 11 (14.7)                                               |                |
| <b>HBV/HCV (n, %)</b>                      | 1 (3.3)                                                   | 1 (1.3)                                                 |                |
| <b>HDV+ (n, %)</b>                         | 21 (70)                                                   | 67 (89.3)                                               | 0.021          |
| <b>Region</b>                              |                                                           |                                                         |                |
| <b>Western (n, %)</b>                      | 3 (11.5)                                                  | 17 (25.8)                                               | ns             |
| <b>Central (n, %)</b>                      | 12 (46.2)                                                 | 25 (37.9)                                               |                |
| <b>Eastern (n, %)</b>                      | 4 (15.4)                                                  | 4 (6.1)                                                 |                |
| <b>Ulaanbaatar (n, %)</b>                  | 7 (26.9)                                                  | 20 (30.3)                                               |                |
| <b>Liver fibrosis (F3-4, %)*</b>           | 6 (20.7)                                                  | 34 (47.2)                                               | 0.015          |
| <b>Tumor size (cm)</b>                     | 6 (3-14.9)                                                | 6.5 (1.6-20)                                            | ns             |
| <b>Multinodular (yes, %)</b>               | 0 (0)                                                     | 12 (17.4)                                               | 0.032          |
| <b>BCLC stage (0-A, %)</b>                 | 24 (96)                                                   | 50 (72.5)                                               | 0.02           |
| <b>BCP A1762T (yes, %)<sup>†</sup></b>     | 2 (11.1)                                                  | 8 (14,5)                                                | ns             |
| <b>BCP G1764A (yes, %)<sup>†</sup></b>     | 2 (11.1)                                                  | 13 (23.6)                                               | ns             |
| <b>Precore G1896A (yes, %)<sup>†</sup></b> | 7 (38.9)                                                  | 14 (25,5)                                               | ns             |

HBV, hepatitis B virus; HCV, hepatitis C virus; HDV, hepatitis delta virus; BCLC, Barcelona Clinic Liver Cancer; BCP, basal pre-core

<sup>‡</sup>Gender information was missing in 9 individuals in the Mongolia cohort

\*Fibrosis stage was evaluated in 168 (88%) in the Mongolia cohort

<sup>†</sup>HBV mutations were evaluated in 73 (69%) patients in the Mongolian cohort (18 HBV-DNA low and 55 HBV-DNA high)

**Supplementary Table 5.** Baseline characteristics of HDV-infected Mongolian patients according to the 25th quartile of HDV-RNA load.

|                                  | <b>Low HDV-RNA</b><br>( <b>&lt;2.4 log IU/ng total RNA</b> )(n=23) | <b>High HDV-RNA</b><br>( <b>≥2.4 log IU/ng total RNA</b> ) (n=66) | <b>p value</b> |
|----------------------------------|--------------------------------------------------------------------|-------------------------------------------------------------------|----------------|
| <b>Age (years)</b>               | 57 (41.1-72.6)                                                     | 56 (44.2-75.6)                                                    | ns             |
| <b>Gender (male, %)</b>          | 8 (36.4)                                                           | 33 (53.2)                                                         | ns             |
| <b>Etiology</b>                  |                                                                    |                                                                   |                |
| <b>HBV/HDV (n, %)</b>            | 17 (73.9)                                                          | 60 (90.9)                                                         | ns             |
| <b>HBV/HCV/HDV (n, %)</b>        | 6 (26.1)                                                           | 6 (9.1)                                                           |                |
| <b>Region</b>                    |                                                                    |                                                                   |                |
| <b>Western (n, %)</b>            | 7 (35)                                                             | 7 (12.3)                                                          | ns             |
| <b>Central (n, %)</b>            | 5 (25)                                                             | 28 (49.1)                                                         |                |
| <b>Eastern (n, %)</b>            | 3 (15)                                                             | 5 (8.8)                                                           |                |
| <b>Ulaanbaatar (n, %)</b>        | 5 (25)                                                             | 17 (29.8)                                                         |                |
| <b>Liver fibrosis (F3-4, %)*</b> | 8 (34.8)                                                           | 30 (45.5)                                                         | ns             |
| <b>Multinodular (yes, %)</b>     | 1 (4.8)                                                            | 12 (20.3)                                                         | ns             |
| <b>BCLC stage (0-A, %)</b>       | 18 (85.7)                                                          | 43 (72.9)                                                         | ns             |
| <b>AFP &gt; 400 IU/mL (n, %)</b> | 7 (35)                                                             | 9 (19.6)                                                          | ns             |
| <b>ALT (IU/L)</b>                | 49.5 (14-426)                                                      | 72.3 (10-452)                                                     | 0.013          |
| <b>BCP A1762T (yes, %)</b>       | 2 (14.3)                                                           | 6 (13.3)                                                          | ns             |
| <b>BCP G1764A (yes, %)</b>       | 3 (21.4)                                                           | 8 (17.8)                                                          | ns             |
| <b>Precore G1896A (yes, %)</b>   | 4 (28.6)                                                           | 8 (17.8)                                                          | ns             |

HBV, hepatitis B virus; HCV, hepatitis C virus; HDV, hepatitis delta virus; BCLC, Barcelona Clinic Liver Cancer; AFP, alfa-fetoprotein; ALT, alanine aminotransferase; BCP, basal pre-core

†‡Gender information was missing in 9 individuals in the Mongolia cohort

\*Fibrosis stage was evaluated in 168 (88%) in the Mongolia cohort

†HBV mutations were evaluated in 68 (64%) patients in the Mongolia cohort

**Supplementary Table 6.** Baseline characteristics of HBV-infected Western patients classified according to the median HBV-DNA load.

|                                            | <b>Low HBV-DNA (&lt;5 log copies/<math>\mu</math>g total DNA) (n=20)</b> | <b>High HBV-DNA (<math>\geq</math>5 log copies/<math>\mu</math>g total DNA) (n=21)</b> | <b>p value</b> |
|--------------------------------------------|--------------------------------------------------------------------------|----------------------------------------------------------------------------------------|----------------|
| <b>Age (years)</b>                         | 63 (29-87)                                                               | 62 (41-78)                                                                             | ns             |
| <b>Gender (male, %)<sup>‡</sup></b>        | 12 (70.5)                                                                | 17 (100%)                                                                              | 0.016          |
| <b>HDV+ (n, %)</b>                         | 1 (5)                                                                    | 2 (10)                                                                                 | ns             |
| <b>Liver fibrosis (F3-4, %)*</b>           | 5 (41.7)                                                                 | 13 (76.5)                                                                              | ns             |
| <b>Tumor size (cm)</b>                     | 5 (1.8-16)                                                               | 5.5 (2-18)                                                                             | ns             |
| <b>Multinodular (yes, %)</b>               | 4 (23.5)                                                                 | 4 (21.1)                                                                               | ns             |
| <b>BCLC stage (0-A, %)</b>                 | 11 (64.7)                                                                | 16 (84.2)                                                                              | ns             |
| <b>BCP A1762T (yes, %)<sup>†</sup></b>     | 8 (50)                                                                   | 13 (72.2)                                                                              | ns             |
| <b>BCP G1764A (yes, %)<sup>†</sup></b>     | 9 (56.3)                                                                 | 14 (77.8)                                                                              | ns             |
| <b>Precore G1896A (yes, %)<sup>†</sup></b> | 7 (43.8)                                                                 | 9 (50)                                                                                 | ns             |

HBV, hepatitis B virus; HCV, hepatitis C virus; HDV, hepatitis delta virus; BCLC, Barcelona Clinic Liver Cancer; BCP, basal pre-core

<sup>‡</sup>Gender information was missing in 15 individuals in the Western cohort

\*Fibrosis stage was evaluated in 135 (72%) in the Western cohort

<sup>†</sup>HBV mutations were evaluated in 35 (80%) patients in the Western cohort

**Supplementary Table 7.** Focal copy number alterations. P values correspond to Fisher test comparing Mongolian and Western cohorts. There was no difference in overall CNV burden between cohorts.

| Chromosome arm | Gain, n (%)      |                 |               |              | Loss, n (%)      |                 |               |              |
|----------------|------------------|-----------------|---------------|--------------|------------------|-----------------|---------------|--------------|
|                | Mongolia (n=151) | Western (n=112) | Total (n=263) | p value      | Mongolia (n=151) | Western (n=112) | Total (n=263) | p value      |
| 8p             | 18 (12%)         | 11 (10%)        | 29 (11%)      | ns           | 59 (39%)         | 66 (59%)        | 125 (48%)     | <b>0.002</b> |
| 9q             | 11 (7%)          | 2 (2%)          | 13 (5%)       | <b>0.047</b> | 14 (9%)          | 24 (21%)        | 38 (14%)      | <b>0.007</b> |
| 1q             | 72 (48%)         | 55 (49%)        | 127 (48%)     | ns           | 2 (1%)           | 6 (5%)          | 8 (3%)        | <b>0.01</b>  |
| 1p             | 29 (19%)         | 9 (8%)          | 38 (14%)      | <b>0.013</b> | 8 (5%)           | 17 (15%)        | 25 (10%)      | ns           |
| 2p             | 17 (11%)         | 10 (9%)         | 27 (10%)      | ns           | 7 (5%)           | 8 (7%)          | 15 (6%)       | ns           |
| 2q             | 15 (10%)         | 8 (7%)          | 23 (9%)       | ns           | 9 (6%)           | 8 (7%)          | 17 (6%)       | ns           |
| 3p             | 8 (5%)           | 5 (4%)          | 13 (5%)       | ns           | 7 (5%)           | 8 (7%)          | 15 (6%)       | ns           |
| 3q             | 13 (9%)          | 5 (4%)          | 18 (7%)       | ns           | 3 (2%)           | 8 (7%)          | 11 (4%)       | ns           |
| 4p             | 6 (4%)           | 5 (4%)          | 11 (4%)       | ns           | 26 (17%)         | 20 (18%)        | 46 (17%)      | ns           |
| 4q             | 2 (1%)           | 3 (3%)          | 5 (2%)        | ns           | 37 (25%)         | 29 (26%)        | 66 (25%)      | ns           |
| 5p             | 35 (23%)         | 31 (28%)        | 66 (25%)      | ns           | 5 (3%)           | 5 (4%)          | 10 (4%)       | ns           |
| 5q             | 24 (16%)         | 27 (24%)        | 51 (19%)      | ns           | 12 (8%)          | 5 (4%)          | 17 (6%)       | ns           |
| 6p             | 40 (26%)         | 28 (25%)        | 68 (26%)      | ns           | 4 (3%)           | 4 (4%)          | 8 (3%)        | ns           |
| 6q             | 19 (13%)         | 11 (10%)        | 30 (11%)      | ns           | 22 (15%)         | 17 (15%)        | 39 (15%)      | ns           |
| 7p             | 53 (35%)         | 30 (27%)        | 83 (32%)      | ns           | 1 (1%)           | 3 (3%)          | 4 (2%)        | ns           |
| 7q             | 55 (36%)         | 30 (27%)        | 85 (32%)      | ns           | 1 (1%)           | 3 (3%)          | 4 (2%)        | ns           |
| 8q             | 66 (44%)         | 61 (54%)        | 127(48%)      | ns           | 8 (5%)           | 5 (4%)          | 13 (5%)       | ns           |
| 9p             | 14(9%)           | 4 (4%)          | 18 (7%)       | ns           | 23 (15%)         | 25 (22%)        | 48 (18%)      | ns           |
| 10p            | 12 (8%)          | 10 (9%)         | 22 (8%)       | ns           | 11 (7%)          | 10 (9%)         | 21 (8%)       | ns           |
| 10q            | 6 (4%)           | 4 (4%)          | 10 (4%)       | ns           | 26 (17%)         | 19 (17%)        | 45 (17%)      | ns           |
| 11p            | 7 (5%)           | 4 (4%)          | 11 (4%)       | ns           | 11 (7%)          | 14              | 25 (10%)      | ns           |
| 11q            | 7 (5%)           | 4 (4%)          | 11 (4%)       | ns           | 12 (8%)          | 15              | 27 (10%)      | ns           |
| 12p            | 14 (9%)          | 9 (8%)          | 23 (9%)       | ns           | 13 (9%)          | 14              | 27 (10%)      | ns           |
| 12q            | 14 (9%)          | 9 (8%)          | 23 (9%)       | ns           | 9 (6%)           | 11              | 20 (8%)       | ns           |
| 13q            | 2 (1%)           | 5 (4%)          | 7 (3%)        | ns           | 26(17%)          | 26              | 52 (20%)      | ns           |
| 14q            | 7 (5%)           | 6 (5%)          | 13 (5%)       | ns           | 16 (11%)         | 13              | 29 (11%)      | ns           |
| 15q            | 6 (4%)           | 2 (2%)          | 8 (3%)        | ns           | 18 (12%)         | 10              | 28 (11%)      | ns           |
| 16p            | 5 3%)            | 6 (5%)          | 11 (4%)       | ns           | 35 (23%)         | 28              | 63 (24%)      | ns           |
| 16q            | 2 (1%)           | 6 (5%)          | 8 (3%)        | ns           | 47 (31%)         | 41              | 88 (33%)      | ns           |
| 17p            | 9 (6%)           | 6 (5%)          | 15 (6%)       | ns           | 36 (24%)         | 23              | 59 (22%)      | ns           |
| 17q            | 21(14%)          | 18 (16%)        | 39 (15%)      | ns           | 7 (5%)           | 9               | 16 (6%)       | ns           |
| 18p            | 11 (7%)          | 3 (3%)          | 14 (5%)       | ns           | 20 (13%)         | 13              | 33 (13%)      | ns           |
| 18q            | 8 (5%)           | 2 (2%)          | 10 (4%)       | ns           | 23 (15%)         | 16              | 39 (15%)      | ns           |
| 19p            | 19 (13%)         | 8 (7%)          | 27 (10%)      | ns           | 18 (12%)         | 19              | 37 (14%)      | ns           |
| 19q            | 20 (13%)         | 12 (11%)        | 32 (12%)      | ns           | 13 (9%)          | 16              | 29 (11%)      | ns           |
| 20p            | 33 (22%)         | 22 (20%)        | 55 (21%)      | ns           | 5 (3%)           | 6               | 11 (4%)       | ns           |
| 20q            | 37 (25%)         | 23 (21%)        | 60 (23%)      | ns           | 4 (3%)           | 2               | 6 (2%)        | ns           |
| 21q            | 5 (3%)           | 10 (9%)         | 15 (6%)       | ns           | 39 (26%)         | 24              | 63 (24%)      | ns           |
| 22q            | 12 (8%)          | 8 (7%)          | 20 (8%)       | ns           | 23 (15%)         | 21              | 44(17%)       | ns           |

**Supplementary Table 8.** Protein-coding mutations and tumor mutational burden. (TMB) in the in-house and external cohorts. TMB is shown as mutations/30 MB (Alexandrov, Nature 2013) and mutations/50 MB (Schulze, Nat Gen 2015) for comparison with previously published data.

|                       | <b>In-house cohorts</b> |         | <b>External cohorts</b> |      |                    |              |
|-----------------------|-------------------------|---------|-------------------------|------|--------------------|--------------|
|                       | Mongolian               | Western | Mongolian NCI           | TCGA | European (Schulze) | Korean (Ahn) |
| Mutations             | 121                     | 70      | 111                     | 76   | 61                 | 63           |
| TMB (Mutations/30 Mb) | 4.0                     | 2.3     | 3.7                     | 2.5  | 2.0                | 2.1          |
| TMB (Mutations/50 Mb) | 2.4                     | 1.4     | 2.2                     | 1.5  | 1.2                | 1.3          |



**Supplementary Table 9.** Mutations in DNA damage repair (DDR) genes in the Mongolian and Western cohorts.

| Gene     | Western cohort                   |                                  | Mongolian cohort                 |                                  |
|----------|----------------------------------|----------------------------------|----------------------------------|----------------------------------|
|          | Patients harboring mutations (n) | Patients harboring mutations (%) | Patients harboring mutations (n) | Patients harboring mutations (%) |
| TP53     | 36                               | 32.14                            | 70                               | 46.36                            |
| ATM      | 7                                | 6.25                             | 13                               | 8.61                             |
| BRCA2    | 4                                | 3.57                             | 3                                | 1.99                             |
| ATR      | 3                                | 2.68                             | 4                                | 2.65                             |
| HERC2    | 3                                | 2.68                             | 3                                | 1.99                             |
| POLE     | 3                                | 2.68                             | 2                                | 1.32                             |
| ATRX     | 2                                | 1.79                             | 9                                | 5.96                             |
| POLD1    | 2                                | 1.79                             | 4                                | 2.65                             |
| REV3L    | 2                                | 1.79                             | 4                                | 2.65                             |
| TP53BP1  | 2                                | 1.79                             | 4                                | 2.65                             |
| PTEN     | 2                                | 1.79                             | 3                                | 1.99                             |
| CUL3     | 2                                | 1.79                             | 2                                | 1.32                             |
| HELQ     | 2                                | 1.79                             | 1                                | 0.66                             |
| PER1     | 2                                | 1.79                             | 1                                | 0.66                             |
| SMARCA4  | 1                                | 0.89                             | 7                                | 4.64                             |
| SHPRH    | 1                                | 0.89                             | 6                                | 3.97                             |
| HFM1     | 1                                | 0.89                             | 5                                | 3.31                             |
| RIF1     | 1                                | 0.89                             | 5                                | 3.31                             |
| FANCA    | 1                                | 0.89                             | 3                                | 1.99                             |
| POLA1    | 1                                | 0.89                             | 3                                | 1.99                             |
| SLX4     | 1                                | 0.89                             | 3                                | 1.99                             |
| SMARCAD1 | 1                                | 0.89                             | 2                                | 1.32                             |
| MSH6     | 1                                | 0.89                             | 1                                | 0.66                             |
| PARP4    | 1                                | 0.89                             | 1                                | 0.66                             |
| SMC5     | 1                                | 0.89                             | 1                                | 0.66                             |
| SMC6     | 1                                | 0.89                             | 1                                | 0.66                             |
| WRN      | 1                                | 0.89                             | 1                                | 0.66                             |
| FANCD2   | 0                                | 0.00                             | 6                                | 3.97                             |
| ASCC3    | 0                                | 0.00                             | 5                                | 3.31                             |
| FANCM    | 0                                | 0.00                             | 5                                | 3.31                             |
| POLQ     | 0                                | 0.00                             | 5                                | 3.31                             |
| BLM      | 0                                | 0.00                             | 4                                | 2.65                             |
| MDC1     | 0                                | 0.00                             | 3                                | 1.99                             |
| PALB2    | 0                                | 0.00                             | 2                                | 1.32                             |
| RAD50    | 0                                | 0.00                             | 2                                | 1.32                             |
| DDB1     | 0                                | 0.00                             | 1                                | 0.66                             |
| MLH3     | 0                                | 0.00                             | 1                                | 0.66                             |
| RFC1     | 0                                | 0.00                             | 1                                | 0.66                             |
| TOPB1    | 0                                | 0.00                             | 0                                | 0.00                             |
| LIGA4    | 0                                | 0.00                             | 0                                | 0.00                             |

**Supplementary Table 10.** 250 genes most frequently mutated genes in the in-house HCC cohort (Mongolia plus Western).

| Gene    | Western cohort                   |                                  | Mongolian cohort                 |                                  |
|---------|----------------------------------|----------------------------------|----------------------------------|----------------------------------|
|         | Patients harboring mutations (n) | Patients harboring mutations (%) | Patients harboring mutations (n) | Patients harboring mutations (%) |
| TP53    | 36                               | 32                               | 70                               | 46                               |
| CTNNB1  | 48                               | 43                               | 55                               | 36                               |
| TTN     | 19                               | 17                               | 55                               | 36                               |
| ALB     | 13                               | 12                               | 26                               | 17                               |
| ARID1A  | 11                               | 10                               | 26                               | 17                               |
| KMT2A   | 3                                | 3                                | 16                               | 11                               |
| RYR2    | 8                                | 7                                | 24                               | 16                               |
| HMCN1   | 7                                | 6                                | 23                               | 15                               |
| APOB    | 5                                | 4                                | 23                               | 15                               |
| CSMD3   | 14                               | 13                               | 22                               | 15                               |
| SYNE1   | 6                                | 5                                | 20                               | 13                               |
| CUBN    | 8                                | 7                                | 19                               | 13                               |
| LAMA1   | 3                                | 3                                | 18                               | 12                               |
| AXIN1   | 8                                | 7                                | 17                               | 11                               |
| ABCA13  | 3                                | 3                                | 16                               | 11                               |
| FSIP2   | 10                               | 9                                | 16                               | 11                               |
| KMT2B   | 5                                | 4                                | 11                               | 7                                |
| DNAH7   | 4                                | 4                                | 16                               | 11                               |
| KMT2C   | 3                                | 3                                | 13                               | 9                                |
| FLG     | 1                                | 1                                | 16                               | 11                               |
| LRP1B   | 11                               | 10                               | 15                               | 10                               |
| NOTCH3  | 1                                | 1                                | 10                               | 7                                |
| OBSCN   | 11                               | 10                               | 15                               | 10                               |
| DNAH8   | 1                                | 1                                | 14                               | 9                                |
| KRT7    | 0                                | 0                                | 14                               | 9                                |
| TSC2    | 1                                | 1                                | 14                               | 9                                |
| PTPN13  | 2                                | 2                                | 14                               | 9                                |
| AHNAK2  | 1                                | 1                                | 14                               | 9                                |
| DNAH9   | 3                                | 3                                | 14                               | 9                                |
| ATM     | 7                                | 6                                | 13                               | 9                                |
| DYNC2H1 | 5                                | 4                                | 13                               | 9                                |
| COL12A1 | 6                                | 5                                | 13                               | 9                                |
| ZNF469  | 4                                | 4                                | 13                               | 9                                |
| COL6A3  | 2                                | 2                                | 13                               | 9                                |

|          |   |   |    |    |
|----------|---|---|----|----|
| FREM2    | 9 | 8 | 10 | 7  |
| IGSF9B   | 9 | 8 | 1  | 1  |
| FAT4     | 6 | 5 | 12 | 8  |
| LRBA     | 1 | 1 | 12 | 8  |
| AKAP9    | 4 | 4 | 12 | 8  |
| DNAH5    | 8 | 7 | 12 | 8  |
| KIAA1109 | 2 | 2 | 12 | 8  |
| ANK3     | 2 | 2 | 12 | 8  |
| ALMS1    | 2 | 2 | 11 | 7  |
| CELSR1   | 3 | 3 | 11 | 7  |
| RYR1     | 6 | 5 | 11 | 7  |
| KMT2D    | 7 | 6 | 16 | 11 |
| PLXNA4   | 1 | 1 | 11 | 7  |
| VCAN     | 3 | 3 | 11 | 7  |
| PCDH15   | 4 | 4 | 11 | 7  |
| EYS      | 5 | 4 | 11 | 7  |
| RB1      | 5 | 4 | 11 | 7  |
| CMYA5    | 0 | 0 | 11 | 7  |
| MYO15A   | 2 | 2 | 11 | 7  |
| TNR      | 4 | 4 | 11 | 7  |
| RNF213   | 1 | 1 | 11 | 7  |
| LRR1Q1   | 5 | 4 | 11 | 7  |
| PRSS3    | 8 | 7 | 4  | 3  |
| TAS2R43  | 8 | 7 | 6  | 4  |
| MACF1    | 8 | 7 | 7  | 5  |
| SPTA1    | 8 | 7 | 8  | 5  |
| DNAH3    | 3 | 3 | 10 | 7  |
| DNAH10   | 5 | 4 | 10 | 7  |
| GPR112   | 1 | 1 | 10 | 7  |
| MGAM     | 1 | 1 | 10 | 7  |
| CHD7     | 2 | 2 | 10 | 7  |
| COL11A1  | 5 | 4 | 10 | 7  |
| CNTNAP5  | 6 | 5 | 10 | 7  |
| SORCS3   | 2 | 2 | 10 | 7  |
| RELN     | 3 | 3 | 10 | 7  |
| FREM1    | 4 | 4 | 10 | 7  |
| WDFY4    | 3 | 3 | 10 | 7  |
| PTPRZ1   | 3 | 3 | 10 | 7  |
| MTOR     | 2 | 2 | 10 | 7  |

|          |   |   |    |   |
|----------|---|---|----|---|
| PTPRB    | 2 | 2 | 10 | 7 |
| SYNE2    | 3 | 3 | 10 | 7 |
| MUC6     | 6 | 5 | 10 | 7 |
| KEAP1    | 6 | 5 | 10 | 7 |
| MYH13    | 1 | 1 | 10 | 7 |
| RYR3     | 5 | 4 | 10 | 7 |
| SLC7A8   | 0 | 0 | 10 | 7 |
| USH2A    | 6 | 5 | 10 | 7 |
| PLEC     | 7 | 6 | 6  | 4 |
| FLNB     | 7 | 6 | 1  | 1 |
| GPR98    | 7 | 6 | 9  | 6 |
| HSPG2    | 2 | 2 | 9  | 6 |
| CACNA2D1 | 5 | 4 | 9  | 6 |
| NAV3     | 1 | 1 | 9  | 6 |
| DNAH2    | 3 | 3 | 9  | 6 |
| DCHS1    | 3 | 3 | 9  | 6 |
| CHD9     | 3 | 3 | 9  | 6 |
| NFE2L2   | 1 | 1 | 9  | 6 |
| PCDH10   | 2 | 2 | 9  | 6 |
| ATRX     | 2 | 2 | 9  | 6 |
| SDK2     | 0 | 0 | 9  | 6 |
| MKI67    | 1 | 1 | 9  | 6 |
| MYH15    | 6 | 5 | 9  | 6 |
| NBEA     | 5 | 4 | 9  | 6 |
| ZNF462   | 2 | 2 | 9  | 6 |
| FBN2     | 4 | 4 | 9  | 6 |
| OTOG     | 1 | 1 | 9  | 6 |
| ARID2    | 4 | 4 | 9  | 6 |
| TRPM6    | 5 | 4 | 9  | 6 |
| NEB      | 3 | 3 | 9  | 6 |
| LAMC3    | 1 | 1 | 9  | 6 |
| ZNF831   | 3 | 3 | 9  | 6 |
| PXDNL    | 1 | 1 | 9  | 6 |
| FMN2     | 4 | 4 | 9  | 6 |
| MUC17    | 2 | 2 | 9  | 6 |
| PIZO2    | 6 | 5 | 5  | 3 |
| ASH1L    | 6 | 5 | 4  | 3 |
| STARD9   | 6 | 5 | 5  | 3 |
| TRPS1    | 6 | 5 | 2  | 1 |

|          |   |   |   |   |
|----------|---|---|---|---|
| GRM5     | 6 | 5 | 4 | 3 |
| TENM3    | 6 | 5 | 6 | 4 |
| LRP2     | 6 | 5 | 5 | 3 |
| OR2L8    | 6 | 5 | 2 | 1 |
| PTPN21   | 6 | 5 | 1 | 1 |
| FRG1B    | 6 | 5 | 0 | 0 |
| PREX2    | 6 | 5 | 2 | 1 |
| DOCK2    | 6 | 5 | 4 | 3 |
| ILDR2    | 6 | 5 | 3 | 2 |
| KIF26B   | 6 | 5 | 5 | 3 |
| LRP1     | 6 | 5 | 8 | 5 |
| JMY      | 0 | 0 | 8 | 5 |
| COL4A5   | 1 | 1 | 8 | 5 |
| AMER3    | 2 | 2 | 8 | 5 |
| KDM3B    | 1 | 1 | 8 | 5 |
| MYH7     | 1 | 1 | 8 | 5 |
| EPHA3    | 3 | 3 | 8 | 5 |
| CNTN6    | 3 | 3 | 8 | 5 |
| PTPRS    | 0 | 0 | 8 | 5 |
| NID2     | 1 | 1 | 8 | 5 |
| CCDC168  | 3 | 3 | 8 | 5 |
| AKAP6    | 1 | 1 | 8 | 5 |
| NIPBL    | 1 | 1 | 8 | 5 |
| UTRN     | 3 | 3 | 8 | 5 |
| KIF21B   | 1 | 1 | 8 | 5 |
| PLXNA3   | 0 | 0 | 8 | 5 |
| HCN1     | 0 | 0 | 8 | 5 |
| IGSF10   | 2 | 2 | 8 | 5 |
| KIAA1731 | 1 | 1 | 8 | 5 |
| NLRP3    | 2 | 2 | 8 | 5 |
| NLRP8    | 3 | 3 | 8 | 5 |
| GTF3C1   | 0 | 0 | 8 | 5 |
| CHD6     | 0 | 0 | 8 | 5 |
| UNC80    | 2 | 2 | 8 | 5 |
| NAV2     | 2 | 2 | 8 | 5 |
| NOS1     | 0 | 0 | 8 | 5 |
| KRT6A    | 0 | 0 | 8 | 5 |
| TTC40    | 4 | 4 | 8 | 5 |
| IRX4     | 1 | 1 | 8 | 5 |

|          |   |   |   |   |
|----------|---|---|---|---|
| PKHD1L1  | 4 | 4 | 8 | 5 |
| ITGB8    | 2 | 2 | 8 | 5 |
| BTAF1    | 1 | 1 | 8 | 5 |
| ARAP3    | 2 | 2 | 8 | 5 |
| TRIP12   | 2 | 2 | 8 | 5 |
| WDFY3    | 3 | 3 | 8 | 5 |
| FLNC     | 1 | 1 | 8 | 5 |
| NWD1     | 1 | 1 | 8 | 5 |
| GABRA1   | 1 | 1 | 8 | 5 |
| PDZD2    | 0 | 0 | 8 | 5 |
| TMEM132C | 1 | 1 | 8 | 5 |
| DCC      | 3 | 3 | 8 | 5 |
| SCN2A    | 1 | 1 | 8 | 5 |
| DLEC1    | 0 | 0 | 8 | 5 |
| SPTBN4   | 5 | 4 | 8 | 5 |
| FAT2     | 1 | 1 | 8 | 5 |
| MDN1     | 3 | 3 | 8 | 5 |
| RNF17    | 1 | 1 | 8 | 5 |
| MAP2     | 0 | 0 | 8 | 5 |
| TELO2    | 0 | 0 | 8 | 5 |
| ERBB4    | 4 | 4 | 8 | 5 |
| EPHA7    | 2 | 2 | 8 | 5 |
| CTNNA2   | 4 | 4 | 8 | 5 |
| PKD1L1   | 4 | 4 | 8 | 5 |
| NRXN1    | 2 | 2 | 8 | 5 |
| TNC      | 3 | 3 | 8 | 5 |
| USP34    | 4 | 4 | 7 | 5 |
| PCDHB5   | 1 | 1 | 7 | 5 |
| PCDH7    | 4 | 4 | 7 | 5 |
| DOCK10   | 3 | 3 | 7 | 5 |
| PTPRT    | 5 | 4 | 7 | 5 |
| CCDC30   | 0 | 0 | 7 | 5 |
| SVEP1    | 3 | 3 | 7 | 5 |
| PCDHA6   | 0 | 0 | 7 | 5 |
| SLIT1    | 0 | 0 | 7 | 5 |
| ADAM21   | 3 | 3 | 7 | 5 |
| NIN      | 1 | 1 | 7 | 5 |
| DMXL2    | 2 | 2 | 7 | 5 |
| DMXL1    | 0 | 0 | 7 | 5 |

|           |   |   |   |   |
|-----------|---|---|---|---|
| HERC1     | 5 | 4 | 7 | 5 |
| LRRRC7    | 3 | 3 | 7 | 5 |
| TG        | 5 | 4 | 7 | 5 |
| ATP10A    | 2 | 2 | 7 | 5 |
| BPTF      | 1 | 1 | 7 | 5 |
| CDHR2     | 1 | 1 | 7 | 5 |
| WNK2      | 1 | 1 | 7 | 5 |
| CDKN2A    | 2 | 2 | 7 | 5 |
| JMJD1C    | 1 | 1 | 7 | 5 |
| PLXNA1    | 2 | 2 | 7 | 5 |
| BMPER     | 2 | 2 | 7 | 5 |
| LAMC2     | 3 | 3 | 7 | 5 |
| SI        | 3 | 3 | 7 | 5 |
| NLRP2     | 1 | 1 | 7 | 5 |
| PIK3R4    | 1 | 1 | 7 | 5 |
| RIMS1     | 1 | 1 | 7 | 5 |
| SPEG      | 3 | 3 | 7 | 5 |
| CACNA1E   | 2 | 2 | 7 | 5 |
| KIAA1217  | 4 | 4 | 7 | 5 |
| IPO9      | 0 | 0 | 7 | 5 |
| DYNC1H1   | 4 | 4 | 7 | 5 |
| NALCN     | 3 | 3 | 7 | 5 |
| PXDN      | 4 | 4 | 7 | 5 |
| DSCAM     | 3 | 3 | 7 | 5 |
| UNC5D     | 4 | 4 | 7 | 5 |
| ZFP36L1   | 0 | 0 | 7 | 5 |
| PRRC2A    | 0 | 0 | 7 | 5 |
| KIAA1462  | 1 | 1 | 7 | 5 |
| ZFPM2     | 2 | 2 | 7 | 5 |
| CACNA1D   | 3 | 3 | 7 | 5 |
| KIAA1549L | 2 | 2 | 7 | 5 |
| BIRC6     | 2 | 2 | 7 | 5 |
| PRDM5     | 3 | 3 | 7 | 5 |
| COL6A6    | 3 | 3 | 7 | 5 |
| PCDH18    | 4 | 4 | 7 | 5 |
| ARID1B    | 5 | 4 | 7 | 5 |
| MYO3A     | 5 | 4 | 7 | 5 |
| MAP1B     | 0 | 0 | 7 | 5 |
| NCOA6     | 1 | 1 | 7 | 5 |

|          |   |   |   |   |
|----------|---|---|---|---|
| UNC13C   | 2 | 2 | 7 | 5 |
| SACS     | 5 | 4 | 7 | 5 |
| SLC4A3   | 3 | 3 | 7 | 5 |
| SYCP2    | 0 | 0 | 7 | 5 |
| RBMXL1   | 2 | 2 | 7 | 5 |
| SMARCA4  | 1 | 1 | 7 | 5 |
| TPO      | 4 | 4 | 7 | 5 |
| TMEM132D | 0 | 0 | 7 | 5 |
| ANK2     | 3 | 3 | 7 | 5 |
| ZNF804B  | 5 | 4 | 7 | 5 |
| ABCA1    | 0 | 0 | 7 | 5 |
| CNOT1    | 1 | 1 | 7 | 5 |
| TOPAZ1   | 3 | 3 | 7 | 5 |
| NPAP1    | 2 | 2 | 7 | 5 |
| COL22A1  | 2 | 2 | 7 | 5 |
| COL4A1   | 1 | 1 | 7 | 5 |
| SCN4A    | 4 | 4 | 7 | 5 |
| ZNF521   | 5 | 4 | 7 | 5 |
| MUC12    | 3 | 3 | 7 | 5 |
| SND1     | 1 | 1 | 7 | 5 |
| SDK1     | 1 | 1 | 7 | 5 |



**Supplementary Table 11.** 100 genes with statistical differences between Mongolian and Western cohorts.

| Gene     | % mutations Mongolian | % mutations Western | Odds ratio Mongolian vs Western | P value Mongolian vs Western | % mutations Europe | % mutations USA | P value Europe vs USA |
|----------|-----------------------|---------------------|---------------------------------|------------------------------|--------------------|-----------------|-----------------------|
| TP53     | 46.4%                 | 32.1%               | 0.548                           | 0.022                        | 26.1%              | 41.9%           | 0.098                 |
| TTN      | 36.4%                 | 17.0%               | 0.357                           | 0.001                        | 20.3%              | 11.6%           | 0.305                 |
| RYR2     | 15.9%                 | 7.1%                | 0.407                           | 0.036                        | 8.7%               | 4.7%            | 0.708                 |
| APOB     | 15.2%                 | 4.5%                | 0.26                            | 0.005                        | 1.4%               | 9.3%            | 0.071                 |
| HMCN1    | 15.2%                 | 6.3%                | 0.371                           | 0.03                         | 1.4%               | 14.0%           | 0.013                 |
| SYNE1    | 13.2%                 | 5.4%                | 0.371                           | 0.038                        | 4.3%               | 7.0%            | 0.674                 |
| LAMA1    | 11.9%                 | 2.7%                | 0.203                           | 0.006                        | 2.9%               | 2.3%            | 1                     |
| FLG      | 10.6%                 | 0.9%                | 0.076                           | 0.001                        | 1.4%               | 0.0%            | 1                     |
| ABCA13   | 10.6%                 | 2.7%                | 0.232                           | 0.015                        | 4.3%               | 0.0%            | 0.284                 |
| KMT2A    | 10.6%                 | 2.7%                | 0.232                           | 0.015                        | 2.9%               | 2.3%            | 1                     |
| DNAH7    | 10.6%                 | 3.6%                | 0.313                           | 0.036                        | 5.8%               | 0.0%            | 0.296                 |
| NOTCH3   | 6.6%                  | 0.9%                | 7.828                           | 0.027                        | 1.4%               | 0.0%            | 1                     |
| KRT7     | 9.3%                  | 0.0%                | 0                               | 0                            | 0.0%               | 0.0%            | NA                    |
| DNAH8    | 9.3%                  | 0.9%                | 0.088                           | 0.003                        | 0.0%               | 2.3%            | 0.384                 |
| TSC2     | 9.3%                  | 0.9%                | 0.088                           | 0.003                        | 0.0%               | 2.3%            | 0.384                 |
| AHNAK2   | 9.3%                  | 0.9%                | 0.088                           | 0.003                        | 0.0%               | 2.3%            | 0.384                 |
| PTPN13   | 9.3%                  | 1.8%                | 0.178                           | 0.016                        | 2.9%               | 0.0%            | 0.523                 |
| DNAH9    | 9.3%                  | 2.7%                | 0.269                           | 0.041                        | 4.3%               | 0.0%            | 0.284                 |
| COL6A3   | 8.6%                  | 1.8%                | 0.193                           | 0.028                        | 1.4%               | 2.3%            | 1                     |
| LRBA     | 7.9%                  | 0.9%                | 0.104                           | 0.009                        | 0.0%               | 2.3%            | 0.384                 |
| ANK3     | 7.9%                  | 1.8%                | 0.211                           | 0.029                        | 1.4%               | 2.3%            | 1                     |
| KIAA1109 | 7.9%                  | 1.8%                | 0.211                           | 0.029                        | 1.4%               | 2.3%            | 1                     |
| CMYA5    | 7.3%                  | 0.0%                | 0                               | 0.003                        | 0.0%               | 0.0%            | NA                    |
| RNF213   | 7.3%                  | 0.9%                | 0.115                           | 0.015                        | 0.0%               | 2.3%            | 0.384                 |
| PLXNA4   | 7.3%                  | 0.9%                | 0.115                           | 0.015                        | 0.0%               | 2.3%            | 0.384                 |
| ALMS1    | 7.3%                  | 1.8%                | 0.231                           | 0.047                        | 1.4%               | 2.3%            | 1                     |
| MYO15A   | 7.3%                  | 1.8%                | 0.231                           | 0.047                        | 1.4%               | 2.3%            | 1                     |
| SLC7A8   | 6.6%                  | 0.0%                | 0                               | 0.006                        | 0.0%               | 0.0%            | NA                    |
| MYH13    | 6.6%                  | 0.9%                | 0.127                           | 0.027                        | 1.4%               | 0.0%            | 1                     |
| MGAM     | 6.6%                  | 0.9%                | 0.127                           | 0.027                        | 0.0%               | 2.3%            | 0.384                 |
| GPR112   | 6.6%                  | 0.9%                | 0.127                           | 0.027                        | 1.4%               | 0.0%            | 1                     |
| SDK2     | 6.0%                  | 0.0%                | 0                               | 0.011                        | 0.0%               | 0.0%            | NA                    |
| NAV3     | 6.0%                  | 0.9%                | 0.142                           | 0.047                        | 1.4%               | 0.0%            | 1                     |

|          |      |      |       |       |      |      |       |
|----------|------|------|-------|-------|------|------|-------|
| MKI67    | 6.0% | 0.9% | 0.142 | 0.047 | 1.4% | 0.0% | 1     |
| NFE2L2   | 6.0% | 0.9% | 0.142 | 0.047 | 1.4% | 0.0% | 1     |
| OTOG     | 6.0% | 0.9% | 0.142 | 0.047 | 1.4% | 0.0% | 1     |
| LAMC3    | 6.0% | 0.9% | 0.142 | 0.047 | 1.4% | 0.0% | 1     |
| PXDNL    | 6.0% | 0.9% | 0.142 | 0.047 | 0.0% | 2.3% | 0.384 |
| GTF3C1   | 5.3% | 0.0% | 0     | 0.023 | 0.0% | 0.0% | NA    |
| NOS1     | 5.3% | 0.0% | 0     | 0.023 | 0.0% | 0.0% | NA    |
| KRT6A    | 5.3% | 0.0% | 0     | 0.023 | 0.0% | 0.0% | NA    |
| JMY      | 5.3% | 0.0% | 0     | 0.023 | 0.0% | 0.0% | NA    |
| PTPRS    | 5.3% | 0.0% | 0     | 0.023 | 0.0% | 0.0% | NA    |
| HCN1     | 5.3% | 0.0% | 0     | 0.023 | 0.0% | 0.0% | NA    |
| MAP2     | 5.3% | 0.0% | 0     | 0.023 | 0.0% | 0.0% | NA    |
| DLEC1    | 5.3% | 0.0% | 0     | 0.023 | 0.0% | 0.0% | NA    |
| CHD6     | 5.3% | 0.0% | 0     | 0.023 | 0.0% | 0.0% | NA    |
| PDZD2    | 5.3% | 0.0% | 0     | 0.023 | 0.0% | 0.0% | NA    |
| PLXNA3   | 5.3% | 0.0% | 0     | 0.023 | 0.0% | 0.0% | NA    |
| TELO2    | 5.3% | 0.0% | 0     | 0.023 | 0.0% | 0.0% | NA    |
| TMEM132D | 4.6% | 0.0% | 0     | 0.022 | 0.0% | 0.0% | NA    |
| PCDHA6   | 4.6% | 0.0% | 0     | 0.022 | 0.0% | 0.0% | NA    |
| DMXL1    | 4.6% | 0.0% | 0     | 0.022 | 0.0% | 0.0% | NA    |
| PRRC2A   | 4.6% | 0.0% | 0     | 0.022 | 0.0% | 0.0% | NA    |
| ZFP36L1  | 4.6% | 0.0% | 0     | 0.022 | 0.0% | 0.0% | NA    |
| SLIT1    | 4.6% | 0.0% | 0     | 0.022 | 0.0% | 0.0% | NA    |
| MAP1B    | 4.6% | 0.0% | 0     | 0.022 | 0.0% | 0.0% | NA    |
| SYCP2    | 4.6% | 0.0% | 0     | 0.022 | 0.0% | 0.0% | NA    |
| CCDC30   | 4.6% | 0.0% | 0     | 0.022 | 0.0% | 0.0% | NA    |
| IPO9     | 4.6% | 0.0% | 0     | 0.022 | 0.0% | 0.0% | NA    |
| ABCA1    | 4.6% | 0.0% | 0     | 0.022 | 0.0% | 0.0% | NA    |
| TNN      | 4.6% | 0.0% | 0     | 0.022 | 0.0% | 0.0% | NA    |
| LMTK3    | 4.0% | 0.0% | 0     | 0.04  | 0.0% | 0.0% | NA    |
| PDGFRA   | 4.0% | 0.0% | 0     | 0.04  | 0.0% | 0.0% | NA    |
| CD1C     | 4.0% | 0.0% | 0     | 0.04  | 0.0% | 0.0% | NA    |
| FAM184B  | 4.0% | 0.0% | 0     | 0.04  | 0.0% | 0.0% | NA    |
| SLC23A1  | 4.0% | 0.0% | 0     | 0.04  | 0.0% | 0.0% | NA    |
| TTLL5    | 4.0% | 0.0% | 0     | 0.04  | 0.0% | 0.0% | NA    |
| LILRA2   | 4.0% | 0.0% | 0     | 0.04  | 0.0% | 0.0% | NA    |
| PCSK5    | 4.0% | 0.0% | 0     | 0.04  | 0.0% | 0.0% | NA    |
| ASTN1    | 4.0% | 0.0% | 0     | 0.04  | 0.0% | 0.0% | NA    |
| ZRSR2    | 4.0% | 0.0% | 0     | 0.04  | 0.0% | 0.0% | NA    |

|          |      |      |        |       |      |      |    |
|----------|------|------|--------|-------|------|------|----|
| DLGAP3   | 4.0% | 0.0% | 0      | 0.04  | 0.0% | 0.0% | NA |
| ABHD17A  | 4.0% | 0.0% | 0      | 0.04  | 0.0% | 0.0% | NA |
| BAZ2B    | 4.0% | 0.0% | 0      | 0.04  | 0.0% | 0.0% | NA |
| FAR2     | 4.0% | 0.0% | 0      | 0.04  | 0.0% | 0.0% | NA |
| KCNT1    | 4.0% | 0.0% | 0      | 0.04  | 0.0% | 0.0% | NA |
| GABRB2   | 4.0% | 0.0% | 0      | 0.04  | 0.0% | 0.0% | NA |
| HEPACAM2 | 4.0% | 0.0% | 0      | 0.04  | 0.0% | 0.0% | NA |
| SLC44A5  | 4.0% | 0.0% | 0      | 0.04  | 0.0% | 0.0% | NA |
| ANKRD31  | 4.0% | 0.0% | 0      | 0.04  | 0.0% | 0.0% | NA |
| PHACTR4  | 4.0% | 0.0% | 0      | 0.04  | 0.0% | 0.0% | NA |
| FANCD2   | 4.0% | 0.0% | 0      | 0.04  | 0.0% | 0.0% | NA |
| COL16A1  | 4.0% | 0.0% | 0      | 0.04  | 0.0% | 0.0% | NA |
| CYP2A13  | 4.0% | 0.0% | 0      | 0.04  | 0.0% | 0.0% | NA |
| SPEN     | 4.0% | 0.0% | 0      | 0.04  | 0.0% | 0.0% | NA |
| PABPC5   | 4.0% | 0.0% | 0      | 0.04  | 0.0% | 0.0% | NA |
| STK31    | 4.0% | 0.0% | 0      | 0.04  | 0.0% | 0.0% | NA |
| CCDC146  | 4.0% | 0.0% | 0      | 0.04  | 0.0% | 0.0% | NA |
| IGSF9B   | 0.7% | 8.0% | 13.107 | 0.002 | 0.0% | 0.0% | NA |
| FLNB     | 0.7% | 6.3% | 10     | 0.012 | 0.0% | 0.0% | NA |
| PTPN21   | 0.7% | 5.4% | 8.491  | 0.044 | 0.0% | 0.0% | NA |
| FRG1B    | 0.0% | 5.4% | inf    | 0.006 | 0.0% | 0.0% | NA |
| KAT6A    | 0.0% | 4.5% | inf    | 0.013 | 0.0% | 0.0% | NA |
| TDO2     | 0.0% | 3.6% | inf    | 0.032 | 0.0% | 0.0% | NA |
| TAF1A    | 0.0% | 3.6% | inf    | 0.032 | 0.0% | 0.0% | NA |
| ASB14    | 0.0% | 3.6% | inf    | 0.032 | 0.0% | 0.0% | NA |
| KIF20A   | 0.0% | 3.6% | inf    | 0.032 | 0.0% | 0.0% | NA |
| SFSWAP   | 0.0% | 3.6% | inf    | 0.032 | 0.0% | 0.0% | NA |
| IGSF3    | 0.0% | 3.6% | inf    | 0.032 | 0.0% | 0.0% | NA |

**Supplementary Table 12.** Genes more frequently mutated in Mongolia versus other cohorts. Genes significantly mutated in 1 or more external non-Mongolian cohorts are shown.

| Gene      | % Mongolian in-house cohort | Western and asian non-Mongolian cohorts |                           |                              |          |                             |            |                               |        |                           | Mongolian NCI cohort |                                             |
|-----------|-----------------------------|-----------------------------------------|---------------------------|------------------------------|----------|-----------------------------|------------|-------------------------------|--------|---------------------------|----------------------|---------------------------------------------|
|           |                             | Number of cohorts with Significant diff | % Western in-house cohort | P VALUE Mongolian vs Western | % Korean | P VALUE Mongolian vs Korean | % European | P VALUE Mongolian vs European | % TCGA | P VALUE Mongolian vs TCGA | % Mongolian NCI      | P VALUE in-house Mongolian vs Mongolian NCI |
| TP53      | 46                          | 4                                       | 32                        | 0.022                        | 31       | 0.00                        | 22         | 0.000                         | 28     | 0.000                     | 30                   | 0.020                                       |
| LAMA1     | 12                          | 4                                       | 3                         | 0.006                        | 6        | 0.03                        | 3          | 0.001                         | 4      | 0.003                     | 8                    | 0.496                                       |
| KRT7      | 9                           | 4                                       | 0                         | 0.000                        | 0        | 0.00                        | 1          | 0.000                         | 1      | 0.000                     | 0                    | 0.006                                       |
| PTPN13    | 9                           | 4                                       | 2                         | 0.016                        | 1        | 0.00                        | 1          | 0.000                         | 4      | 0.015                     | 3                    | 0.099                                       |
| COL6A3    | 9                           | 4                                       | 2                         | 0.028                        | 3        | 0.04                        | 3          | 0.036                         | 4      | 0.026                     | 8                    | 1.000                                       |
| GPR112    | 7                           | 4                                       | 1                         | 0.027                        | 0        | 0.00                        | 1          | 0.007                         | 0      | 0.000                     | 0                    | 0.033                                       |
| ALMS1     | 7                           | 4                                       | 2                         | 0.047                        | 3        | 0.04                        | 2          | 0.006                         | 3      | 0.026                     | 3                    | 0.233                                       |
| MYO15A    | 7                           | 3                                       | 2                         | 0.047                        | 3        | 0.04                        | 2          | 0.006                         | 1      | 0.001                     | 4                    | 0.556                                       |
| PRRC2A    | 5                           | 3                                       | 0                         | 0.022                        | 0        | 0.00                        | 1          | 0.0497                        | 0      | 0.001                     | 0                    | 0.100                                       |
| DLEC1     | 5                           | 4                                       | 0                         | 0.023                        | 1        | 0.02                        | 1          | 0.016                         | 1      | 0.025                     | 4                    | 1.000                                       |
| JMY       | 5                           | 4                                       | 0                         | 0.023                        | 0        | 0.00                        | 0          | 0.003                         | 0      | 0.000                     | 0                    | 0.057                                       |
| KRT6A     | 5                           | 4                                       | 0                         | 0.023                        | 1        | 0.03                        | 0          | 0.000                         | 1      | 0.008                     | 0                    | 0.057                                       |
| TELO2     | 5                           | 4                                       | 0                         | 0.023                        | 0        | 0.00                        | 1          | 0.016                         | 1      | 0.001                     | 3                    | 0.508                                       |
| PLXNA3    | 5                           | 4                                       | 0                         | 0.023                        | 0        | 0.00                        | 1          | 0.016                         | 1      | 0.025                     | 3                    | 0.508                                       |
| ARID1A    | 17                          | 3                                       | 10                        | 0.107                        | 3        | 0.00                        | 10         | 0.043                         | 7      | 0.001                     | 4                    | 0.002                                       |
| KMT2C     | 9                           | 3                                       | 3                         | 0.062                        | 3        | 0.01                        | 0          | 0.000                         | 3      | 0.008                     | 6                    | 0.591                                       |
| CSMD3     | 15                          | 3                                       | 13                        | 0.718                        | 8        | 0.04                        | 6          | 0.008                         | 8      | 0.034                     | 13                   | 0.674                                       |
| AGRN      | 4                           | 3                                       | 1                         | 0.244                        | 0        | 0.02                        | 0          | 0.015                         | 0      | 0.001                     | 6                    | 0.730                                       |
| CUBN      | 13                          | 3                                       | 7                         | 0.217                        | 6        | 0.04                        | 3          | 0.000                         | 5      | 0.005                     | 10                   | 0.496                                       |
| AKAP9     | 8                           | 3                                       | 4                         | 0.193                        | 3        | 0.02                        | 2          | 0.023                         | 1      | 0.000                     | 0                    | 0.011                                       |
| PRDM5     | 5                           | 3                                       | 3                         | 0.524                        | 0        | 0.01                        | 1          | 0.031                         | 1      | 0.018                     | 1                    | 0.441                                       |
| PIK3R4    | 5                           | 3                                       | 1                         | 0.143                        | 1        | 0.03                        | 1          | 0.031                         | 1      | 0.009                     | 3                    | 0.722                                       |
| CELSR1    | 7                           | 3                                       | 3                         | 0.163                        | 3        | 0.04                        | 1          | 0.001                         | 2      | 0.009                     | 1                    | 0.109                                       |
| MUC6      | 7                           | 3                                       | 5                         | 0.797                        | 2        | 0.02                        | 1          | 0.002                         | 2      | 0.012                     | 1                    | 0.181                                       |
| ARAP3     | 5                           | 3                                       | 2                         | 0.197                        | 0        | 0.00                        | 0          | 0.003                         | 2      | 0.047                     | 3                    | 0.508                                       |
| BTAF1     | 5                           | 3                                       | 1                         | 0.083                        | 1        | 0.02                        | 1          | 0.016                         | 2      | 0.033                     | 6                    | 1.000                                       |
| GABRA1    | 5                           | 3                                       | 1                         | 0.083                        | 0        | 0.00                        | 0          | 0.003                         | 2      | 0.033                     | 0                    | 0.057                                       |
| KIAA1731  | 5                           | 3                                       | 1                         | 0.083                        | 1        | 0.03                        | 1          | 0.026                         | 0      | 0.000                     | 0                    | 0.057                                       |
| BAI1      | 5                           | 3                                       | 1                         | 0.143                        | 0        | 0.01                        | 1          | 0.031                         | 0      | 0.000                     | 0                    | 0.100                                       |
| BEND5     | 3                           | 3                                       | 0                         | 0.074                        | 0        | 0.01                        | 0          | 0.033                         | 1      | 0.025                     | 0                    | 0.180                                       |
| C10orf118 | 3                           | 3                                       | 0                         | 0.074                        | 0        | 0.04                        | 0          | 0.033                         | 0      | 0.002                     | 0                    | 0.180                                       |
| CCDC147   | 3                           | 3                                       | 0                         | 0.074                        | 0        | 0.04                        | 0          | 0.033                         | 0      | 0.002                     | 0                    | 0.180                                       |
| CCT8      | 3                           | 3                                       | 0                         | 0.074                        | 0        | 0.04                        | 0          | 0.033                         | 0      | 0.002                     | 1                    | 0.667                                       |
| CDC42EP4  | 3                           | 3                                       | 0                         | 0.074                        | 0        | 0.04                        | 0          | 0.008                         | 0      | 0.002                     | 1                    | 0.667                                       |
| FAM83E    | 3                           | 3                                       | 1                         | 0.244                        | 0        | 0.04                        | 0          | 0.033                         | 0      | 0.010                     | 1                    | 0.667                                       |
| FERD3L    | 3                           | 3                                       | 1                         | 0.244                        | 0        | 0.04                        | 0          | 0.033                         | 0      | 0.010                     | 0                    | 0.180                                       |
| GART      | 3                           | 3                                       | 1                         | 0.244                        | 0        | 0.04                        | 0          | 0.008                         | 1      | 0.025                     | 0                    | 0.180                                       |
| HOMER3    | 3                           | 3                                       | 0                         | 0.074                        | 0        | 0.04                        | 0          | 0.033                         | 0      | 0.002                     | 1                    | 0.667                                       |
| LMNA      | 3                           | 3                                       | 1                         | 0.244                        | 0        | 0.04                        | 0          | 0.008                         | 1      | 0.025                     | 1                    | 0.667                                       |
| LRRC36    | 3                           | 3                                       | 0                         | 0.074                        | 0        | 0.01                        | 0          | 0.033                         | 0      | 0.010                     | 3                    | 1.000                                       |
| MAP6      | 3                           | 3                                       | 0                         | 0.074                        | 0        | 0.01                        | 0          | 0.033                         | 0      | 0.002                     | 1                    | 0.667                                       |
| AADAT     | 3                           | 3                                       | 1                         | 0.398                        | 0        | 0.02                        | 0          | 0.021                         | 0      | 0.028                     | 1                    | 1.000                                       |
| ARFIP1    | 3                           | 3                                       | 0                         | 0.139                        | 0        | 0.02                        | 0          | 0.021                         | 0      | 0.028                     | 1                    | 1.000                                       |
| ATP6AP1   | 3                           | 3                                       | 0                         | 0.139                        | 0        | 0.02                        | 0          | 0.021                         | 0      | 0.028                     | 0                    | 0.309                                       |
| PRKAR1B   | 3                           | 3                                       | 1                         | 0.398                        | 0        | 0.02                        | 0          | 0.021                         | 0      | 0.007                     | 0                    | 0.309                                       |
| PNPLA2    | 3                           | 3                                       | 0                         | 0.139                        | 0        | 0.02                        | 0          | 0.021                         | 0      | 0.007                     | 0                    | 0.309                                       |
| OSMR      | 3                           | 3                                       | 0                         | 0.139                        | 0        | 0.02                        | 0          | 0.021                         | 0      | 0.007                     | 1                    | 1.000                                       |

|          |    |   |   |       |    |       |    |       |    |       |    |       |
|----------|----|---|---|-------|----|-------|----|-------|----|-------|----|-------|
| CSMD1    | 0  | 3 | 0 | 1.000 | 4  | 0.01  | 8  | 0.000 | 6  | 0.002 | 10 | 0.001 |
| DMD      | 0  | 3 | 0 | 1.000 | 6  | 0.00  | 3  | 0.047 | 4  | 0.008 | 8  | 0.003 |
| DNAH17   | 0  | 3 | 0 | 1.000 | 5  | 0.00  | 3  | 0.026 | 4  | 0.013 | 4  | 0.032 |
| DST      | 0  | 3 | 0 | 1.000 | 10 | 0.00  | 5  | 0.004 | 4  | 0.013 | 3  | 0.101 |
| FRAS1    | 0  | 3 | 0 | 1.000 | 4  | 0.01  | 5  | 0.002 | 5  | 0.003 | 6  | 0.010 |
| MUC16    | 0  | 3 | 0 | 1.000 | 23 | 0.00  | 12 | 0.000 | 16 | 0.000 | 30 | 0.000 |
| MUC2     | 0  | 3 | 0 | 1.000 | 3  | 0.045 | 3  | 0.047 | 5  | 0.002 | 0  | 1.000 |
| PCLO     | 0  | 3 | 0 | 1.000 | 15 | 0.000 | 9  | 0.000 | 11 | 0.000 | 15 | 0.000 |
| NLRP8    | 5  | 3 | 3 | 0.363 | 1  | 0.03  | 1  | 0.016 | 1  | 0.001 | 0  | 0.057 |
| PHACTR4  | 4  | 3 | 0 | 0.040 | 1  | 0.06  | 0  | 0.015 | 1  | 0.022 | 0  | 0.180 |
| HMCN1    | 15 | 3 | 6 | 0.030 | 13 | 0.55  | 5  | 0.000 | 7  | 0.008 | 11 | 0.302 |
| SYNE1    | 13 | 3 | 5 | 0.038 | 10 | 0.32  | 2  | 0.000 | 4  | 0.000 | 13 | 1.000 |
| LRBA     | 8  | 3 | 1 | 0.009 | 5  | 0.29  | 1  | 0.002 | 1  | 0.000 | 4  | 0.397 |
| KMT2A    | 11 | 3 | 3 | 0.015 | 5  | 0.07  | 2  | 0.001 | 3  | 0.001 | 6  | 0.316 |
| CMYA5    | 7  | 3 | 0 | 0.003 | 3  | 0.08  | 1  | 0.003 | 2  | 0.009 | 1  | 0.109 |
| RNF213   | 7  | 3 | 1 | 0.015 | 4  | 0.25  | 2  | 0.006 | 2  | 0.009 | 1  | 0.109 |
| MGAM     | 7  | 3 | 1 | 0.027 | 6  | 0.83  | 2  | 0.030 | 2  | 0.018 | 4  | 0.558 |
| LAMC3    | 6  | 3 | 1 | 0.047 | 2  | 0.09  | 2  | 0.038 | 2  | 0.017 | 0  | 0.061 |
| CHD6     | 5  | 3 | 0 | 0.023 | 3  | 0.18  | 1  | 0.026 | 2  | 0.047 | 0  | 0.057 |
| CCDC30   | 5  | 3 | 0 | 0.022 | 1  | 0.06  | 0  | 0.001 | 1  | 0.009 | 1  | 0.441 |
| PCDHA6   | 5  | 3 | 0 | 0.022 | 1  | 0.06  | 0  | 0.006 | 1  | 0.047 | 0  | 0.100 |
| ABHD17A  | 4  | 3 | 0 | 0.040 | 1  | 0.06  | 0  | 0.003 | 0  | 0.001 | 0  | 0.180 |
| CD1C     | 4  | 3 | 0 | 0.040 | 1  | 0.06  | 0  | 0.015 | 0  | 0.003 | 0  | 0.180 |
| CYP2A13  | 4  | 3 | 0 | 0.040 | 1  | 0.06  | 0  | 0.003 | 1  | 0.010 | 1  | 0.435 |
| FAM184B  | 4  | 3 | 0 | 0.040 | 1  | 0.16  | 0  | 0.015 | 1  | 0.022 | 1  | 0.435 |
| FANCD2   | 4  | 3 | 0 | 0.040 | 2  | 0.20  | 0  | 0.003 | 1  | 0.022 | 1  | 0.435 |
| ZRSR2    | 4  | 3 | 0 | 0.040 | 1  | 0.16  | 0  | 0.015 | 0  | 0.003 | 1  | 0.435 |
| CCDC146  | 4  | 3 | 0 | 0.040 | 0  | 0.00  | 0  | 0.003 | 1  | 0.071 | 4  | 1.000 |
| NOTCH3   | 7  | 3 | 1 | 0.027 | 0  | 0.00  | 2  | 0.064 | 3  | 0.047 | 1  | 0.181 |
| SLC23A1  | 4  | 3 | 0 | 0.040 | 0  | 0.00  | 1  | 0.059 | 0  | 0.003 | 0  | 0.180 |
| OTOG     | 6  | 3 | 1 | 0.047 | 2  | 0.04  | 2  | 0.105 | 1  | 0.006 | 6  | 1.000 |
| HCN1     | 5  | 3 | 0 | 0.023 | 0  | 0.00  | 2  | 0.067 | 2  | 0.033 | 0  | 0.057 |
| MYH13    | 7  | 3 | 1 | 0.027 | 2  | 0.02  | 2  | 0.064 | 1  | 0.003 | 4  | 0.558 |
| TSC2     | 9  | 3 | 1 | 0.003 | 3  | 0.01  | 5  | 0.088 | 3  | 0.008 | 7  | 0.798 |
| FAR2     | 4  | 3 | 0 | 0.040 | 0  | 0.00  | 1  | 0.059 | 0  | 0.003 | 1  | 0.435 |
| HEPACAM2 | 4  | 3 | 0 | 0.040 | 0  | 0.02  | 1  | 0.059 | 1  | 0.022 | 0  | 0.180 |
| TTL5     | 4  | 3 | 0 | 0.040 | 0  | 0.00  | 1  | 0.059 | 0  | 0.003 | 3  | 1.000 |

**Supplementary Table 13.** Substitution frequency in the Mongolian, Western, and Mongolian NCI cohorts. Differences between Mongolian vs Western and Mongolian NCI vs Western are also indicated.

| Substitution | Substitution frequency Mongolian | Substitution frequency Western | Difference Mongolian vs Western | Substitution frequency Mongolian NCI | Difference Mongolian NCI vs Western |
|--------------|----------------------------------|--------------------------------|---------------------------------|--------------------------------------|-------------------------------------|
| A[C>A]A      | 0.016                            | 0.011                          | 0.164                           | 0.014                                | 0.083                               |
| A[C>A]C      | 0.013                            | 0.012                          | 0.054                           | 0.014                                | 0.079                               |
| A[C>A]G      | 0.007                            | 0.01                           | -0.174                          | 0.006                                | -0.247                              |
| A[C>A]T      | 0.009                            | 0.007                          | 0.123                           | 0.009                                | 0.107                               |
| C[C>A]A      | 0.016                            | 0.017                          | -0.041                          | 0.018                                | 0.016                               |
| C[C>A]C      | 0.017                            | 0.015                          | 0.043                           | 0.018                                | 0.078                               |
| C[C>A]G      | 0.01                             | 0.012                          | -0.082                          | 0.013                                | 0.027                               |
| C[C>A]T      | 0.013                            | 0.011                          | 0.091                           | 0.014                                | 0.151                               |
| G[C>A]A      | 0.014                            | 0.012                          | 0.079                           | 0.017                                | 0.197                               |
| G[C>A]C      | 0.015                            | 0.016                          | -0.035                          | 0.017                                | 0.031                               |
| G[C>A]G      | 0.012                            | 0.013                          | -0.059                          | 0.016                                | 0.079                               |
| G[C>A]T      | 0.01                             | 0.009                          | 0.033                           | 0.015                                | 0.235                               |
| T[C>A]A      | 0.016                            | 0.018                          | -0.063                          | 0.017                                | -0.028                              |
| T[C>A]C      | 0.025                            | 0.021                          | 0.096                           | 0.025                                | 0.096                               |
| T[C>A]G      | 0.01                             | 0.01                           | 0.026                           | 0.009                                | -0.023                              |
| T[C>A]T      | 0.018                            | 0.017                          | 0.03                            | 0.019                                | 0.076                               |
| A[C>G]A      | 0.005                            | 0.005                          | -0.002                          | 0.005                                | 0.04                                |
| A[C>G]C      | 0.005                            | 0.005                          | 0.045                           | 0.006                                | 0.077                               |
| A[C>G]G      | 0.002                            | 0.002                          | 0.105                           | 0.003                                | 0.239                               |
| A[C>G]T      | 0.006                            | 0.004                          | 0.192                           | 0.005                                | 0.149                               |
| C[C>G]A      | 0.006                            | 0.007                          | -0.044                          | 0.005                                | -0.145                              |
| C[C>G]C      | 0.008                            | 0.006                          | 0.105                           | 0.008                                | 0.097                               |
| C[C>G]G      | 0.005                            | 0.006                          | -0.078                          | 0.005                                | -0.131                              |
| C[C>G]T      | 0.01                             | 0.009                          | 0.05                            | 0.008                                | -0.022                              |
| G[C>G]A      | 0.003                            | 0.004                          | -0.083                          | 0.003                                | -0.158                              |
| G[C>G]C      | 0.006                            | 0.006                          | 0.021                           | 0.005                                | -0.08                               |
| G[C>G]G      | 0.003                            | 0.004                          | -0.108                          | 0.002                                | -0.256                              |
| G[C>G]T      | 0.005                            | 0.005                          | 0.06                            | 0.006                                | 0.129                               |
| T[C>G]A      | 0.007                            | 0.007                          | -0.006                          | 0.006                                | -0.085                              |
| T[C>G]C      | 0.009                            | 0.01                           | -0.016                          | 0.009                                | -0.019                              |
| T[C>G]G      | 0.003                            | 0.003                          | 0.071                           | 0.002                                | -0.137                              |
| T[C>G]T      | 0.012                            | 0.014                          | -0.069                          | 0.012                                | -0.057                              |

|         |       |       |        |       |        |
|---------|-------|-------|--------|-------|--------|
| A[C>T]A | 0.012 | 0.013 | -0.074 | 0.01  | -0.13  |
| A[C>T]C | 0.01  | 0.011 | -0.043 | 0.011 | 0.008  |
| A[C>T]G | 0.019 | 0.025 | -0.135 | 0.028 | 0.05   |
| A[C>T]T | 0.007 | 0.009 | -0.111 | 0.008 | -0.058 |
| C[C>T]A | 0.019 | 0.024 | -0.123 | 0.02  | -0.092 |
| C[C>T]C | 0.018 | 0.022 | -0.097 | 0.02  | -0.056 |
| C[C>T]G | 0.023 | 0.032 | -0.162 | 0.033 | 0.01   |
| C[C>T]T | 0.018 | 0.023 | -0.119 | 0.017 | -0.148 |
| G[C>T]A | 0.018 | 0.018 | -0.017 | 0.021 | 0.08   |
| G[C>T]C | 0.022 | 0.021 | 0.022  | 0.031 | 0.197  |
| G[C>T]G | 0.027 | 0.035 | -0.118 | 0.045 | 0.132  |
| G[C>T]T | 0.016 | 0.018 | -0.063 | 0.017 | -0.036 |
| T[C>T]A | 0.02  | 0.019 | 0.043  | 0.021 | 0.055  |
| T[C>T]C | 0.018 | 0.024 | -0.123 | 0.021 | -0.061 |
| T[C>T]G | 0.013 | 0.019 | -0.176 | 0.019 | 0.006  |
| T[C>T]T | 0.013 | 0.017 | -0.164 | 0.013 | -0.145 |
| A[T>A]A | 0.004 | 0.003 | 0.049  | 0.002 | -0.19  |
| A[T>A]C | 0.005 | 0.006 | -0.083 | 0.005 | -0.068 |
| A[T>A]G | 0.01  | 0.01  | 0.006  | 0.006 | -0.198 |
| A[T>A]T | 0.004 | 0.004 | -0.038 | 0.003 | -0.168 |
| C[T>A]A | 0.007 | 0.005 | 0.163  | 0.004 | -0.073 |
| C[T>A]C | 0.016 | 0.012 | 0.141  | 0.012 | 0.019  |
| C[T>A]G | 0.037 | 0.026 | 0.179  | 0.024 | -0.036 |
| C[T>A]T | 0.01  | 0.008 | 0.086  | 0.009 | 0.017  |
| G[T>A]A | 0.004 | 0.003 | 0.213  | 0.003 | 0.081  |
| G[T>A]C | 0.005 | 0.005 | 0.05   | 0.006 | 0.125  |
| G[T>A]G | 0.009 | 0.008 | 0.012  | 0.007 | -0.102 |
| G[T>A]T | 0.004 | 0.003 | 0.085  | 0.002 | -0.207 |
| T[T>A]A | 0.004 | 0.004 | 0.075  | 0.003 | -0.077 |
| T[T>A]C | 0.008 | 0.007 | 0.057  | 0.006 | -0.087 |
| T[T>A]G | 0.009 | 0.009 | -0.009 | 0.006 | -0.195 |
| T[T>A]T | 0.005 | 0.005 | -0.015 | 0.004 | -0.164 |
| A[T>C]A | 0.016 | 0.017 | -0.049 | 0.015 | -0.086 |
| A[T>C]C | 0.007 | 0.009 | -0.113 | 0.007 | -0.164 |
| A[T>C]G | 0.024 | 0.025 | -0.014 | 0.022 | -0.056 |
| A[T>C]T | 0.011 | 0.013 | -0.07  | 0.011 | -0.089 |
| C[T>C]A | 0.006 | 0.006 | -0.046 | 0.005 | -0.101 |
| C[T>C]C | 0.012 | 0.011 | 0.055  | 0.011 | -0.011 |
| C[T>C]G | 0.018 | 0.018 | 0.013  | 0.016 | -0.04  |

|         |       |       |        |       |        |
|---------|-------|-------|--------|-------|--------|
| C[T>C]T | 0.01  | 0.009 | 0.017  | 0.009 | 0.005  |
| G[T>C]A | 0.01  | 0.01  | -0.001 | 0.008 | -0.122 |
| G[T>C]C | 0.009 | 0.009 | -0.023 | 0.008 | -0.08  |
| G[T>C]G | 0.012 | 0.012 | 0.019  | 0.01  | -0.08  |
| G[T>C]T | 0.01  | 0.01  | 0.037  | 0.009 | -0.036 |
| T[T>C]A | 0.006 | 0.007 | -0.067 | 0.006 | -0.049 |
| T[T>C]C | 0.007 | 0.008 | -0.108 | 0.007 | -0.068 |
| T[T>C]G | 0.01  | 0.009 | 0.048  | 0.01  | 0.045  |
| T[T>C]T | 0.006 | 0.006 | 0.038  | 0.006 | -0.023 |
| A[T>G]A | 0.003 | 0.002 | 0.162  | 0.002 | -0.19  |
| A[T>G]C | 0.004 | 0.002 | 0.282  | 0.003 | 0.137  |
| A[T>G]G | 0.012 | 0.004 | 0.505  | 0.005 | 0.123  |
| A[T>G]T | 0.006 | 0.003 | 0.272  | 0.005 | 0.234  |
| C[T>G]A | 0.002 | 0.002 | 0.103  | 0.002 | 0.126  |
| C[T>G]C | 0.005 | 0.006 | -0.111 | 0.006 | -0.053 |
| C[T>G]G | 0.011 | 0.007 | 0.202  | 0.009 | 0.085  |
| C[T>G]T | 0.011 | 0.01  | 0.019  | 0.009 | -0.098 |
| G[T>G]A | 0.002 | 0.001 | 0.323  | 0.001 | -0.062 |
| G[T>G]C | 0.003 | 0.002 | 0.144  | 0.003 | 0.14   |
| G[T>G]G | 0.007 | 0.002 | 0.464  | 0.004 | 0.23   |
| G[T>G]T | 0.004 | 0.004 | 0.012  | 0.004 | 0.013  |
| T[T>G]A | 0.004 | 0.002 | 0.327  | 0.002 | -0.023 |
| T[T>G]C | 0.006 | 0.005 | 0.071  | 0.005 | -0.005 |
| T[T>G]G | 0.009 | 0.004 | 0.361  | 0.005 | 0.092  |
| T[T>G]T | 0.007 | 0.007 | -0.013 | 0.005 | -0.14  |



**Supplementary Table 14.** Assignment of the four de novo extracted HCC signatures to all single and linear combinations of two COSMIC v3 signatures. Signature mapping highlighted in yellow indicated the assignment used in our analysis, selected based on cosine similarity (Cos sim).

| de novo signature 1 |                         |         | de novo signature 2 |                         |         | de novo signature 3 |                         |         | de novo signature 4 (SBSM) |                         |         |
|---------------------|-------------------------|---------|---------------------|-------------------------|---------|---------------------|-------------------------|---------|----------------------------|-------------------------|---------|
| Reference signature | Weight                  | Cos sim | Reference signature | Weight                  | Cos sim | Reference signature | Weight                  | Cos sim | Reference signature        | Weight                  | Cos sim |
| SBS22               | SBS22=1                 | 0.9735  | SBS6 + SBS40        | SBS6=0.12; SBS40=0.88   | 0.91406 | SBS16 + SBS26       | SBS16=0.45; SBS26=0.55  | 0.92379 | SBS28 + SBS40              | SBS28=0.09; SBS40=0.91  | 0.81766 |
| SBS3 + SBS22        | SBS3=0.12; SBS22=0.88   | 0.97496 | SBS15 + SBS40       | SBS15=0.09; SBS40=0.91  | 0.90401 | SBS12 + SBS16       | SBS12=0.55; SBS16=0.45  | 0.91218 | SBS17b + SBS40             | SBS17b=0.07; SBS40=0.93 | 0.81288 |
| SBS22 + SBS25       | SBS22=0.86; SBS25=0.14  | 0.97488 | SBS30 + SBS40       | SBS30=0.13; SBS40=0.87  | 0.90294 | SBS16 + SBS54       | SBS16=0.67; SBS54=0.33  | 0.89886 | SBS9 + SBS40               | SBS9=0.3; SBS40=0.7     | 0.80978 |
| SBS8 + SBS22        | SBS8=0.09; SBS22=0.91   | 0.97469 | SBS23 + SBS40       | SBS23=0.1; SBS40=0.9    | 0.9012  | SBS16 + SBS46       | SBS16=0.59; SBS46=0.41  | 0.88026 | SBS40 + SBS55              | SBS40=0.9; SBS55=0.1    | 0.8047  |
| SBS4 + SBS22        | SBS4=0.07; SBS22=0.93   | 0.97468 | SBS19 + SBS40       | SBS19=0.09; SBS40=0.91  | 0.8984  | SBS16 + SBS33       | SBS16=0.76; SBS33=0.24  | 0.87846 | SBS40 + SBS43              | SBS40=0.93; SBS43=0.07  | 0.78171 |
| SBS22 + SBS40       | SBS22=0.9; SBS40=0.1    | 0.97462 | SBS40 + SBS42       | SBS40=0.85; SBS42=0.15  | 0.89789 | SBS16 + SBS21       | SBS16=0.74; SBS21=0.26  | 0.86621 | SBS40 + SBS60              | SBS40=0.98; SBS60=0.02  | 0.77619 |
| SBS22 + SBS46       | SBS22=0.95; SBS46=0.05  | 0.97415 | SBS40 + SBS84       | SBS40=0.89; SBS84=0.11  | 0.89751 | SBS5 + SBS16        | SBS5=0.59; SBS16=0.41   | 0.86563 | SBS40 + SBS54              | SBS40=0.97; SBS54=0.03  | 0.77316 |
| SBS18 + SBS22       | SBS18=0.04; SBS22=0.96  | 0.97412 | SBS32 + SBS40       | SBS32=0.11; SBS40=0.89  | 0.89374 | SBS5 + SBS26        | SBS5=0.55; SBS26=0.45   | 0.85408 | SBS40 + SBS41              | SBS40=0.93; SBS41=0.07  | 0.77314 |
| SBS22 + SBS45       | SBS22=0.97; SBS45=0.03  | 0.97409 | SBS1 + SBS40        | SBS1=0.05; SBS40=0.95   | 0.89348 | SBS16 + SBS25       | SBS16=0.56; SBS25=0.44  | 0.85369 | SBS37 + SBS40              | SBS37=0.06; SBS40=0.94  | 0.77238 |
| SBS22 + SBS39       | SBS22=0.94; SBS39=0.06  | 0.97407 | SBS40 + SBS44       | SBS40=0.88; SBS44=0.12  | 0.89218 | SBS16 + SBS37       | SBS16=0.57; SBS37=0.43  | 0.85156 | SBS40 + SBS51              | SBS40=0.97; SBS51=0.03  | 0.77162 |
| SBS22 + SBS36       | SBS22=0.97; SBS36=0.03  | 0.97406 | SBS24 + SBS40       | SBS24=0.13; SBS40=0.87  | 0.89124 | SBS3 + SBS16        | SBS3=0.46; SBS16=0.54   | 0.84754 | SBS40 + SBS57              | SBS40=0.98; SBS57=0.02  | 0.77099 |
| SBS22 + SBS38       | SBS22=0.98; SBS38=0.02  | 0.97392 | SBS11 + SBS40       | SBS11=0.08; SBS40=0.92  | 0.89086 | SBS5 + SBS12        | SBS5=0.55; SBS12=0.45   | 0.84635 | SBS1 + SBS40               | SBS1=0; SBS40=0.1       | 0.7703  |
| SBS17a + SBS22      | SBS17a=0.02; SBS22=0.98 | 0.97391 | SBS7b + SBS40       | SBS7b=0.07; SBS40=0.93  | 0.88954 | SBS16 + SBS44       | SBS16=0.74; SBS44=0.26  | 0.84225 | SBS2 + SBS40               | SBS2=0; SBS40=0.1       | 0.7703  |
| SBS22 + SBS35       | SBS22=0.96; SBS35=0.04  | 0.97391 | SBS7a + SBS40       | SBS7a=0.05; SBS40=0.95  | 0.88584 | SBS16 + SBS40       | SBS16=0.62; SBS40=0.38  | 0.83552 | SBS3 + SBS40               | SBS3=0; SBS40=0.1       | 0.7703  |
| SBS22 + SBS56       | SBS22=0.98; SBS56=0.02  | 0.9739  | SBS29 + SBS40       | SBS29=0.1; SBS40=0.9    | 0.88549 | SBS16 + SBS17a      | SBS16=0.89; SBS17a=0.11 | 0.83266 | SBS4 + SBS40               | SBS4=0; SBS40=0.1       | 0.7703  |
| SBS5 + SBS22        | SBS5=0.06; SBS22=0.94   | 0.97389 | SBS5 + SBS40        | SBS5=0.22; SBS40=0.78   | 0.88366 | SBS26 + SBS40       | SBS26=0.62; SBS40=0.38  | 0.83076 | SBS5 + SBS40               | SBS5=0; SBS40=0.1       | 0.7703  |
| SBS22 + SBS54       | SBS22=0.98; SBS54=0.02  | 0.97388 | SBS31 + SBS40       | SBS31=0.07; SBS40=0.93  | 0.88193 | SBS9 + SBS16        | SBS9=0.27; SBS16=0.73   | 0.83046 | SBS6 + SBS40               | SBS6=0; SBS40=0.1       | 0.7703  |
| SBS22 + SBS29       | SBS22=0.97; SBS29=0.03  | 0.97387 | SBS18 + SBS40       | SBS18=0.07; SBS40=0.93  | 0.88079 | SBS8 + SBS26        | SBS8=0.28; SBS26=0.72   | 0.8304  | SBS7a + SBS40              | SBS7a=0; SBS40=0.1      | 0.7703  |
| SBS22 + SBS24       | SBS22=0.97; SBS24=0.03  | 0.97383 | SBS20 + SBS40       | SBS20=0.05; SBS40=0.95  | 0.88025 | SBS4 + SBS16        | SBS4=0.23; SBS16=0.77   | 0.8302  | SBS7b + SBS40              | SBS7b=0; SBS40=0.1      | 0.7703  |
| SBS22 + SBS53       | SBS22=0.98; SBS53=0.02  | 0.97381 | SBS2 + SBS40        | SBS2=0.02; SBS40=0.98   | 0.88024 | SBS26 + SBS58       | SBS26=0.78; SBS58=0.22  | 0.82948 | SBS7c + SBS40              | SBS7c=0; SBS40=0.1      | 0.7703  |
| SBS13 + SBS22       | SBS13=0.01; SBS22=0.99  | 0.97381 | SBS21 + SBS40       | SBS21=0.04; SBS40=0.96  | 0.8797  | SBS7d + SBS16       | SBS7d=0.13; SBS16=0.87  | 0.82906 | SBS7d + SBS40              | SBS7d=0; SBS40=0.1      | 0.7703  |
| SBS20 + SBS22       | SBS20=0.02; SBS22=0.98  | 0.97378 | SBS36 + SBS40       | SBS36=0.04; SBS40=0.96  | 0.87903 | SBS3 + SBS26        | SBS3=0.38; SBS26=0.62   | 0.82839 | SBS8 + SBS40               | SBS8=0; SBS40=0.1       | 0.7703  |
| SBS10a + SBS22      | SBS10a=0.01; SBS22=0.99 | 0.97378 | SBS4 + SBS40        | SBS4=0.07; SBS40=0.93   | 0.87889 | SBS8 + SBS16        | SBS8=0.24; SBS16=0.76   | 0.82801 | SBS10a + SBS40             | SBS10a=0; SBS40=0.1     | 0.7703  |
| SBS9 + SBS22        | SBS9=0.04; SBS22=0.96   | 0.97375 | SBS40 + SBS52       | SBS40=0.98; SBS52=0.02  | 0.87874 | SBS16 + SBS20       | SBS16=0.86; SBS20=0.14  | 0.82791 | SBS10b + SBS40             | SBS10b=0; SBS40=0.1     | 0.7703  |
| SBS22 + SBS57       | SBS22=0.98; SBS57=0.02  | 0.97371 | SBS7d + SBS40       | SBS7d=0.03; SBS40=0.97  | 0.87816 | SBS4 + SBS26        | SBS4=0.24; SBS26=0.76   | 0.82751 | SBS11 + SBS40              | SBS11=0; SBS40=0.1      | 0.7703  |
| SBS22 + SBS52       | SBS22=0.99; SBS52=0.01  | 0.97369 | SBS40 + SBS50       | SBS40=0.96; SBS50=0.04  | 0.87811 | SBS16 + SBS42       | SBS16=0.82; SBS42=0.18  | 0.82731 | SBS12 + SBS40              | SBS12=0; SBS40=0.1      | 0.7703  |
| SBS22 + SBS33       | SBS22=0.99; SBS33=0.01  | 0.97369 | SBS35 + SBS40       | SBS35=0.05; SBS40=0.95  | 0.87799 | SBS16 + SBS35       | SBS16=0.81; SBS35=0.19  | 0.82729 | SBS13 + SBS40              | SBS13=0; SBS40=0.1      | 0.7703  |
| SBS22 + SBS44       | SBS22=0.98; SBS44=0.02  | 0.97368 | SBS14 + SBS40       | SBS14=0.03; SBS40=0.97  | 0.87768 | SBS25 + SBS26       | SBS25=0.33; SBS26=0.67  | 0.82666 | SBS14 + SBS40              | SBS14=0; SBS40=0.1      | 0.7703  |
| SBS22 + SBS41       | SBS22=0.97; SBS41=0.03  | 0.97368 | SBS10b + SBS40      | SBS10b=0.02; SBS40=0.98 | 0.87748 | SBS16 + SBS18       | SBS16=0.84; SBS18=0.16  | 0.82605 | SBS15 + SBS40              | SBS15=0; SBS40=0.1      | 0.7703  |
| SBS22 + SBS55       | SBS22=0.99; SBS55=0.01  | 0.97366 | SBS40 + SBS46       | SBS40=0.96; SBS46=0.04  | 0.87704 | SBS14 + SBS16       | SBS14=0.11; SBS16=0.89  | 0.82554 | SBS16 + SBS40              | SBS16=0; SBS40=0.1      | 0.7703  |
| SBS22 + SBS49       | SBS22=0.99; SBS49=0.01  | 0.97365 | SBS40 + SBS45       | SBS40=0.98; SBS45=0.02  | 0.87686 | SBS16 + SBS24       | SBS16=0.83; SBS24=0.17  | 0.82548 | SBS17a + SBS40             | SBS17a=0; SBS40=0.1     | 0.7703  |
| SBS22 + SBS31       | SBS22=0.98; SBS31=0.02  | 0.97365 | SBS40 + SBS48       | SBS40=0.99; SBS48=0.01  | 0.87654 | SBS16 + SBS31       | SBS16=0.85; SBS31=0.15  | 0.82525 | SBS18 + SBS40              | SBS18=0; SBS40=0.1      | 0.7703  |

|                   |                           |         |                   |                           |         |                   |                            |         |                  |                          |         |
|-------------------|---------------------------|---------|-------------------|---------------------------|---------|-------------------|----------------------------|---------|------------------|--------------------------|---------|
| SBS14 +<br>SBS22  | SBS14=0.01;<br>SBS22=0.99 | 0.97364 | SBS40 +<br>SBS49  | SBS40=0.99;<br>SBS49=0.01 | 0.87642 | SBS16 +<br>SBS29  | SBS16=0.85;<br>SBS29=0.15  | 0.82461 | SBS19 +<br>SBS40 | SBS19=0;<br>SBS40=1      | 0.7703  |
| SBS22 +<br>SBS42  | SBS22=0.98;<br>SBS42=0.02 | 0.97363 | SBS40 +<br>SBS59  | SBS40=0.99;<br>SBS59=0.01 | 0.8761  | SBS16 +<br>SBS36  | SBS16=0.88;<br>SBS36=0.12  | 0.8245  | SBS20 +<br>SBS40 | SBS20=0;<br>SBS40=1      | 0.7703  |
| SBS22 +<br>SBS26  | SBS22=0.98;<br>SBS26=0.02 | 0.97362 | SBS40 +<br>SBS56  | SBS40=0.99;<br>SBS56=0.01 | 0.87605 | SBS16 +<br>SBS43  | SBS16=0.89;<br>SBS43=0.11  | 0.82397 | SBS21 +<br>SBS40 | SBS21=0;<br>SBS40=1      | 0.7703  |
| SBS7d +<br>SBS22  | SBS7d=0.01;<br>SBS22=0.99 | 0.97362 | SBS40 +<br>SBS53  | SBS40=0.99;<br>SBS53=0.01 | 0.87588 | SBS16 +<br>SBS57  | SBS16=0.87;<br>SBS57=0.13  | 0.82355 | SBS22 +<br>SBS40 | SBS22=0;<br>SBS40=1      | 0.7703  |
| SBS21 +<br>SBS22  | SBS21=0.01;<br>SBS22=0.99 | 0.9736  | SBS3 +<br>SBS40   | SBS3=0.05;<br>SBS40=0.95  | 0.87583 | SBS16 +<br>SBS41  | SBS16=0.84;<br>SBS41=0.16  | 0.82332 | SBS23 +<br>SBS40 | SBS23=0;<br>SBS40=1      | 0.7703  |
| SBS22 +<br>SBS30  | SBS22=0.99;<br>SBS30=0.01 | 0.97359 | SBS38 +<br>SBS40  | SBS38=0.01;<br>SBS40=0.99 | 0.87583 | SBS16 +<br>SBS22  | SBS16=0.89;<br>SBS22=0.11  | 0.82315 | SBS24 +<br>SBS40 | SBS24=0;<br>SBS40=1      | 0.7703  |
| SBS22 +<br>SBS28  | SBS22=0.99;<br>SBS28=0.01 | 0.97359 | SBS25 +<br>SBS40  | SBS25=0.01;<br>SBS40=0.99 | 0.87559 | SBS16 +<br>SBS58  | SBS16=0.87;<br>SBS58=0.13  | 0.82201 | SBS25 +<br>SBS40 | SBS25=0;<br>SBS40=1      | 0.7703  |
| SBS7b +<br>SBS22  | SBS7b=0.01;<br>SBS22=0.99 | 0.97358 | SBS33 +<br>SBS40  | SBS33=0.01;<br>SBS40=0.99 | 0.87558 | SBS7c +<br>SBS16  | SBS7c=0.09;<br>SBS16=0.91  | 0.82177 | SBS26 +<br>SBS40 | SBS26=0;<br>SBS40=1      | 0.7703  |
| SBS15 +<br>SBS22  | SBS15=0.01;<br>SBS22=0.99 | 0.97358 | SBS7c +<br>SBS40  | SBS7c=0;<br>SBS40=1       | 0.87558 | SBS16 +<br>SBS39  | SBS16=0.82;<br>SBS39=0.18  | 0.82168 | SBS27 +<br>SBS40 | SBS27=0;<br>SBS40=1      | 0.7703  |
| SBS22 +<br>SBS37  | SBS22=0.98;<br>SBS37=0.02 | 0.97358 | SBS8 +<br>SBS40   | SBS8=0;<br>SBS40=1        | 0.87558 | SBS16 +<br>SBS45  | SBS16=0.93;<br>SBS45=0.07  | 0.82148 | SBS29 +<br>SBS40 | SBS29=0;<br>SBS40=1      | 0.7703  |
| SBS22 +<br>SBS50  | SBS22=0.99;<br>SBS50=0.01 | 0.97357 | SBS9 +<br>SBS40   | SBS9=0;<br>SBS40=1        | 0.87558 | SBS16 +<br>SBS50  | SBS16=0.9;<br>SBS50=0.1    | 0.82125 | SBS30 +<br>SBS40 | SBS30=0;<br>SBS40=1      | 0.7703  |
| SBS22 +<br>SBS23  | SBS22=0.99;<br>SBS23=0.01 | 0.97356 | SBS10a +<br>SBS40 | SBS10a=0;<br>SBS40=1      | 0.87558 | SBS16 +<br>SBS17b | SBS16=0.95;<br>SBS17b=0.05 | 0.82121 | SBS31 +<br>SBS40 | SBS31=0;<br>SBS40=1      | 0.7703  |
| SBS12 +<br>SBS22  | SBS12=0.02;<br>SBS22=0.98 | 0.97356 | SBS12 +<br>SBS40  | SBS12=0;<br>SBS40=1       | 0.87558 | SBS12 +<br>SBS58  | SBS12=0.79;<br>SBS58=0.21  | 0.82118 | SBS32 +<br>SBS40 | SBS32=0;<br>SBS40=1      | 0.7703  |
| SBS22 +<br>SBS32  | SBS22=0.99;<br>SBS32=0.01 | 0.97355 | SBS13 +<br>SBS40  | SBS13=0;<br>SBS40=1       | 0.87558 | SBS26 +<br>SBS35  | SBS26=0.8;<br>SBS35=0.2    | 0.82115 | SBS33 +<br>SBS40 | SBS33=0;<br>SBS40=1      | 0.7703  |
| SBS6 +<br>SBS22   | SBS6=0.01;<br>SBS22=0.99  | 0.97353 | SBS16 +<br>SBS40  | SBS16=0;<br>SBS40=1       | 0.87558 | SBS16 +<br>SBS56  | SBS16=0.95;<br>SBS56=0.05  | 0.82099 | SBS34 +<br>SBS40 | SBS34=0;<br>SBS40=1      | 0.7703  |
| SBS22 +<br>SBS84  | SBS22=0.99;<br>SBS84=0.01 | 0.97353 | SBS17a +<br>SBS40 | SBS17a=0;<br>SBS40=1      | 0.87558 | SBS10a +<br>SBS16 | SBS10a=0.04;<br>SBS16=0.96 | 0.82091 | SBS35 +<br>SBS40 | SBS35=0;<br>SBS40=1      | 0.7703  |
| SBS19 +<br>SBS22  | SBS19=0.01;<br>SBS22=0.99 | 0.97353 | SBS17b +<br>SBS40 | SBS17b=0;<br>SBS40=1      | 0.87558 | SBS16 +<br>SBS53  | SBS16=0.93;<br>SBS53=0.07  | 0.82086 | SBS36 +<br>SBS40 | SBS36=0;<br>SBS40=1      | 0.7703  |
| SBS22 +<br>SBS43  | SBS22=0.99;<br>SBS43=0.01 | 0.97353 | SBS22 +<br>SBS40  | SBS22=0;<br>SBS40=1       | 0.87558 | SBS7b +<br>SBS16  | SBS7b=0.07;<br>SBS16=0.93  | 0.82053 | SBS38 +<br>SBS40 | SBS38=0;<br>SBS40=1      | 0.7703  |
| SBS11 +<br>SBS22  | SBS11=0.01;<br>SBS22=0.99 | 0.9735  | SBS26 +<br>SBS40  | SBS26=0;<br>SBS40=1       | 0.87558 | SBS16 +<br>SBS38  | SBS16=0.95;<br>SBS38=0.05  | 0.8205  | SBS39 +<br>SBS40 | SBS39=0;<br>SBS40=1      | 0.7703  |
| SBS1 +<br>SBS22   | SBS1=0;<br>SBS22=1        | 0.9735  | SBS27 +<br>SBS40  | SBS27=0;<br>SBS40=1       | 0.87558 | SBS16 +<br>SBS30  | SBS16=0.92;<br>SBS30=0.08  | 0.82029 | SBS40 +<br>SBS42 | SBS40=1;<br>SBS42=0      | 0.7703  |
| SBS2 +<br>SBS22   | SBS2=0;<br>SBS22=1        | 0.9735  | SBS28 +<br>SBS40  | SBS28=0;<br>SBS40=1       | 0.87558 | SBS16 +<br>SBS51  | SBS16=0.91;<br>SBS51=0.09  | 0.82005 | SBS40 +<br>SBS44 | SBS40=1;<br>SBS44=0      | 0.7703  |
| SBS7a +<br>SBS22  | SBS7a=0;<br>SBS22=1       | 0.9735  | SBS34 +<br>SBS40  | SBS34=0;<br>SBS40=1       | 0.87558 | SBS15 +<br>SBS16  | SBS15=0.06;<br>SBS16=0.94  | 0.81994 | SBS40 +<br>SBS45 | SBS40=1;<br>SBS45=0      | 0.7703  |
| SBS7c +<br>SBS22  | SBS7c=0;<br>SBS22=1       | 0.9735  | SBS37 +<br>SBS40  | SBS37=0;<br>SBS40=1       | 0.87558 | SBS16 +<br>SBS23  | SBS16=0.94;<br>SBS23=0.06  | 0.81989 | SBS40 +<br>SBS46 | SBS40=1;<br>SBS46=0      | 0.7703  |
| SBS10b +<br>SBS22 | SBS10b=0;<br>SBS22=1      | 0.9735  | SBS39 +<br>SBS40  | SBS39=0;<br>SBS40=1       | 0.87558 | SBS16 +<br>SBS32  | SBS16=0.92;<br>SBS32=0.08  | 0.81977 | SBS40 +<br>SBS47 | SBS40=1;<br>SBS47=0      | 0.7703  |
| SBS16 +<br>SBS22  | SBS16=0;<br>SBS22=1       | 0.9735  | SBS40 +<br>SBS41  | SBS40=1;<br>SBS41=0       | 0.87558 | SBS18 +<br>SBS26  | SBS18=0.17;<br>SBS26=0.83  | 0.81968 | SBS40 +<br>SBS48 | SBS40=1;<br>SBS48=0      | 0.7703  |
| SBS17b +<br>SBS22 | SBS17b=0;<br>SBS22=1      | 0.9735  | SBS40 +<br>SBS43  | SBS40=1;<br>SBS43=0       | 0.87558 | SBS11 +<br>SBS16  | SBS11=0.05;<br>SBS16=0.95  | 0.81942 | SBS40 +<br>SBS49 | SBS40=1;<br>SBS49=0      | 0.7703  |
| SBS22 +<br>SBS27  | SBS22=1;<br>SBS27=0       | 0.9735  | SBS40 +<br>SBS47  | SBS40=1;<br>SBS47=0       | 0.87558 | SBS12 +<br>SBS40  | SBS12=0.65;<br>SBS40=0.35  | 0.81938 | SBS40 +<br>SBS50 | SBS40=1;<br>SBS50=0      | 0.7703  |
| SBS22 +<br>SBS34  | SBS22=1;<br>SBS34=0       | 0.9735  | SBS40 +<br>SBS51  | SBS40=1;<br>SBS51=0       | 0.87558 | SBS6 +<br>SBS16   | SBS6=0.05;<br>SBS16=0.95   | 0.81914 | SBS40 +<br>SBS52 | SBS40=1;<br>SBS52=0      | 0.7703  |
| SBS22 +<br>SBS47  | SBS22=1;<br>SBS47=0       | 0.9735  | SBS40 +<br>SBS54  | SBS40=1;<br>SBS54=0       | 0.87558 | SBS16 +<br>SBS84  | SBS16=0.94;<br>SBS84=0.06  | 0.81912 | SBS40 +<br>SBS53 | SBS40=1;<br>SBS53=0      | 0.7703  |
| SBS22 +<br>SBS48  | SBS22=1;<br>SBS48=0       | 0.9735  | SBS40 +<br>SBS55  | SBS40=1;<br>SBS55=0       | 0.87558 | SBS12 +<br>SBS25  | SBS12=0.67;<br>SBS25=0.33  | 0.8191  | SBS40 +<br>SBS56 | SBS40=1;<br>SBS56=0      | 0.7703  |
| SBS22 +<br>SBS51  | SBS22=1;<br>SBS51=0       | 0.9735  | SBS40 +<br>SBS57  | SBS40=1;<br>SBS57=0       | 0.87558 | SBS16 +<br>SBS55  | SBS16=0.96;<br>SBS55=0.04  | 0.81907 | SBS40 +<br>SBS58 | SBS40=1;<br>SBS58=0      | 0.7703  |
| SBS22 +<br>SBS58  | SBS22=1;<br>SBS58=0       | 0.9735  | SBS40 +<br>SBS58  | SBS40=1;<br>SBS58=0       | 0.87558 | SBS16 +<br>SBS85  | SBS16=0.93;<br>SBS85=0.07  | 0.81886 | SBS40 +<br>SBS59 | SBS40=1;<br>SBS59=0      | 0.7703  |
| SBS22 +<br>SBS59  | SBS22=1;<br>SBS59=0       | 0.9735  | SBS40 +<br>SBS60  | SBS40=1;<br>SBS60=0       | 0.87558 | SBS16 +<br>SBS19  | SBS16=0.96;<br>SBS19=0.04  | 0.81872 | SBS40 +<br>SBS84 | SBS40=1;<br>SBS84=0      | 0.7703  |
| SBS22 +<br>SBS60  | SBS22=1;<br>SBS60=0       | 0.9735  | SBS40 +<br>SBS85  | SBS40=1;<br>SBS85=0       | 0.87558 | SBS16 +<br>SBS59  | SBS16=0.97;<br>SBS59=0.03  | 0.81868 | SBS40 +<br>SBS85 | SBS40=1;<br>SBS85=0      | 0.7703  |
| SBS22 +<br>SBS85  | SBS22=1;<br>SBS85=0       | 0.9735  | SBS40             | SBS40=1                   | 0.87558 | SBS7a +<br>SBS16  | SBS7a=0.03;<br>SBS16=0.97  | 0.81845 | SBS40            | SBS40=1                  | 0.7703  |
| SBS25 +<br>SBS27  | SBS25=0.9;<br>SBS27=0.1   | 0.7411  | SBS3 +<br>SBS30   | SBS3=0.8;<br>SBS30=0.2    | 0.86242 | SBS16 +<br>SBS52  | SBS16=0.98;<br>SBS52=0.02  | 0.81845 | SBS3 +<br>SBS9   | SBS3=0.51;<br>SBS9=0.49  | 0.74308 |
| SBS25 +<br>SBS34  | SBS25=0.96;<br>SBS34=0.04 | 0.72535 | SBS5 +<br>SBS29   | SBS5=0.77;<br>SBS29=0.23  | 0.85806 | SBS22 +<br>SBS26  | SBS22=0.14;<br>SBS26=0.86  | 0.81825 | SBS3 +<br>SBS28  | SBS3=0.86;<br>SBS28=0.14 | 0.74092 |
| SBS25 +<br>SBS35  | SBS25=0.91;<br>SBS35=0.09 | 0.72431 | SBS5 +<br>SBS18   | SBS5=0.77;<br>SBS18=0.23  | 0.85756 | SBS10b +<br>SBS16 | SBS10b=0.02;<br>SBS16=0.98 | 0.81815 | SBS4 +<br>SBS9   | SBS4=0.27;<br>SBS9=0.73  | 0.72368 |
| SBS8 +<br>SBS25   | SBS8=0.04;<br>SBS25=0.96  | 0.72021 | SBS4 +<br>SBS5    | SBS4=0.27;<br>SBS5=0.73   | 0.85722 | SBS16 +<br>SBS49  | SBS16=0.98;<br>SBS49=0.02  | 0.81808 | SBS9 +<br>SBS55  | SBS9=0.85;<br>SBS55=0.15 | 0.72333 |

|                   |                           |         |                  |                           |         |                  |                           |         |                  |                          |         |
|-------------------|---------------------------|---------|------------------|---------------------------|---------|------------------|---------------------------|---------|------------------|--------------------------|---------|
| SBS25 +<br>SBS47  | SBS25=0.98;<br>SBS47=0.02 | 0.72016 | SBS5 +<br>SBS36  | SBS5=0.84;<br>SBS36=0.16  | 0.85037 | SBS16 +<br>SBS60 | SBS16=0.99;<br>SBS60=0.01 | 0.81805 | SBS9 +<br>SBS39  | SBS9=0.67;<br>SBS39=0.33 | 0.71522 |
| SBS1 +<br>SBS25   | SBS1=0;<br>SBS25=1        | 0.71986 | SBS5 +<br>SBS24  | SBS5=0.76;<br>SBS24=0.24  | 0.84979 | SBS4 +<br>SBS12  | SBS4=0.23;<br>SBS12=0.77  | 0.8179  | SBS9 +<br>SBS18  | SBS9=0.78;<br>SBS18=0.22 | 0.71505 |
| SBS2 +<br>SBS25   | SBS2=0;<br>SBS25=1        | 0.71986 | SBS3 +<br>SBS7a  | SBS3=0.89;<br>SBS7a=0.11  | 0.84274 | SBS16 +<br>SBS47 | SBS16=0.98;<br>SBS47=0.02 | 0.81789 | SBS8 +<br>SBS9   | SBS8=0.29;<br>SBS9=0.71  | 0.71393 |
| SBS3 +<br>SBS25   | SBS3=0;<br>SBS25=1        | 0.71986 | SBS2 +<br>SBS3   | SBS2=0.07;<br>SBS3=0.93   | 0.83827 | SBS1 +<br>SBS16  | SBS1=0;<br>SBS16=1        | 0.81776 | SBS9 +<br>SBS29  | SBS9=0.79;<br>SBS29=0.21 | 0.71238 |
| SBS4 +<br>SBS25   | SBS4=0;<br>SBS25=1        | 0.71986 | SBS3 +<br>SBS32  | SBS3=0.82;<br>SBS32=0.18  | 0.83301 | SBS2 +<br>SBS16  | SBS2=0;<br>SBS16=1        | 0.81776 | SBS5 +<br>SBS9   | SBS5=0.4;<br>SBS9=0.6    | 0.71213 |
| SBS5 +<br>SBS25   | SBS5=0;<br>SBS25=1        | 0.71986 | SBS3 +<br>SBS5   | SBS3=0.49;<br>SBS5=0.51   | 0.83275 | SBS13 +<br>SBS16 | SBS13=0;<br>SBS16=1       | 0.81776 | SBS9 +<br>SBS50  | SBS9=0.82;<br>SBS50=0.18 | 0.71142 |
| SBS6 +<br>SBS25   | SBS6=0;<br>SBS25=1        | 0.71986 | SBS5 +<br>SBS52  | SBS5=0.92;<br>SBS52=0.08  | 0.83155 | SBS16 +<br>SBS27 | SBS16=1;<br>SBS27=0       | 0.81776 | SBS9 +<br>SBS51  | SBS9=0.8;<br>SBS51=0.2   | 0.71029 |
| SBS7a +<br>SBS25  | SBS7a=0;<br>SBS25=1       | 0.71986 | SBS3 +<br>SBS6   | SBS3=0.87;<br>SBS6=0.13   | 0.83149 | SBS16 +<br>SBS28 | SBS16=1;<br>SBS28=0       | 0.81776 | SBS9 +<br>SBS24  | SBS9=0.79;<br>SBS24=0.21 | 0.70762 |
| SBS7b +<br>SBS25  | SBS7b=0;<br>SBS25=1       | 0.71986 | SBS5 +<br>SBS8   | SBS5=0.75;<br>SBS8=0.25   | 0.83072 | SBS16 +<br>SBS34 | SBS16=1;<br>SBS34=0       | 0.81776 | SBS3 +<br>SBS17b | SBS3=0.9;<br>SBS17b=0.1  | 0.7051  |
| SBS7c +<br>SBS25  | SBS7c=0;<br>SBS25=1       | 0.71986 | SBS5 +<br>SBS30  | SBS5=0.83;<br>SBS30=0.17  | 0.82942 | SBS16 +<br>SBS48 | SBS16=1;<br>SBS48=0       | 0.81776 | SBS9 +<br>SBS36  | SBS9=0.85;<br>SBS36=0.15 | 0.70343 |
| SBS7d +<br>SBS25  | SBS7d=0;<br>SBS25=1       | 0.71986 | SBS5 +<br>SBS45  | SBS5=0.9;<br>SBS45=0.1    | 0.82939 | SBS16            | SBS16=1                   | 0.81776 | SBS5 +<br>SBS28  | SBS5=0.83;<br>SBS28=0.17 | 0.70299 |
| SBS9 +<br>SBS25   | SBS9=0;<br>SBS25=1        | 0.71986 | SBS3 +<br>SBS19  | SBS3=0.87;<br>SBS19=0.13  | 0.82841 | SBS26 +<br>SBS36 | SBS26=0.87;<br>SBS36=0.13 | 0.81735 | SBS2 +<br>SBS9   | SBS2=0.07;<br>SBS9=0.93  | 0.70113 |
| SBS10a +<br>SBS25 | SBS10a=0;<br>SBS25=1      | 0.71986 | SBS3 +<br>SBS18  | SBS3=0.81;<br>SBS18=0.19  | 0.82689 | SBS12 +<br>SBS54 | SBS12=0.82;<br>SBS54=0.18 | 0.81686 | SBS9 +<br>SBS30  | SBS9=0.86;<br>SBS30=0.14 | 0.6986  |
| SBS10b +<br>SBS25 | SBS10b=0;<br>SBS25=1      | 0.71986 | SBS5 +<br>SBS35  | SBS5=0.81;<br>SBS35=0.19  | 0.82575 | SBS8 +<br>SBS12  | SBS8=0.25;<br>SBS12=0.75  | 0.81658 | SBS9 +<br>SBS25  | SBS9=0.73;<br>SBS25=0.27 | 0.69554 |
| SBS11 +<br>SBS25  | SBS11=0;<br>SBS25=1       | 0.71986 | SBS5 +<br>SBS42  | SBS5=0.8;<br>SBS42=0.2    | 0.82529 | SBS26 +<br>SBS29 | SBS26=0.84;<br>SBS29=0.16 | 0.81623 | SBS9 +<br>SBS42  | SBS9=0.84;<br>SBS42=0.16 | 0.69521 |
| SBS12 +<br>SBS25  | SBS12=0;<br>SBS25=1       | 0.71986 | SBS5 +<br>SBS50  | SBS5=0.85;<br>SBS50=0.15  | 0.82463 | SBS3 +<br>SBS12  | SBS3=0.35;<br>SBS12=0.65  | 0.81582 | SBS9 +<br>SBS35  | SBS9=0.82;<br>SBS35=0.18 | 0.69516 |
| SBS13 +<br>SBS25  | SBS13=0;<br>SBS25=1       | 0.71986 | SBS5 +<br>SBS19  | SBS5=0.88;<br>SBS19=0.12  | 0.82431 | SBS24 +<br>SBS26 | SBS24=0.17;<br>SBS26=0.83 | 0.81564 | SBS9 +<br>SBS32  | SBS9=0.86;<br>SBS32=0.14 | 0.69422 |
| SBS14 +<br>SBS25  | SBS14=0;<br>SBS25=1       | 0.71986 | SBS3 +<br>SBS11  | SBS3=0.88;<br>SBS11=0.12  | 0.82371 | SBS26 +<br>SBS42 | SBS26=0.84;<br>SBS42=0.16 | 0.81558 | SBS9 +<br>SBS45  | SBS9=0.9;<br>SBS45=0.1   | 0.69358 |
| SBS15 +<br>SBS25  | SBS15=0;<br>SBS25=1       | 0.71986 | SBS3 +<br>SBS36  | SBS3=0.86;<br>SBS36=0.14  | 0.82323 | SBS26 +<br>SBS31 | SBS26=0.85;<br>SBS31=0.15 | 0.81503 | SBS7a +<br>SBS9  | SBS7a=0.08;<br>SBS9=0.92 | 0.69292 |
| SBS16 +<br>SBS25  | SBS16=0;<br>SBS25=1       | 0.71986 | SBS3 +<br>SBS23  | SBS3=0.88;<br>SBS23=0.12  | 0.82169 | SBS12 +<br>SBS35 | SBS12=0.8;<br>SBS35=0.2   | 0.815   | SBS9 +<br>SBS43  | SBS9=0.89;<br>SBS43=0.11 | 0.69124 |
| SBS17a +<br>SBS25 | SBS17a=0;<br>SBS25=1      | 0.71986 | SBS8 +<br>SBS30  | SBS8=0.61;<br>SBS30=0.39  | 0.82138 | SBS12 +<br>SBS26 | SBS12=0.45;<br>SBS26=0.55 | 0.81435 | SBS9 +<br>SBS13  | SBS9=0.93;<br>SBS13=0.07 | 0.69049 |
| SBS17b +<br>SBS25 | SBS17b=0;<br>SBS25=1      | 0.71986 | SBS4 +<br>SBS30  | SBS4=0.59;<br>SBS30=0.41  | 0.82111 | SBS26 +<br>SBS56 | SBS26=0.93;<br>SBS56=0.07 | 0.81104 | SBS9 +<br>SBS28  | SBS9=0.92;<br>SBS28=0.08 | 0.68905 |
| SBS18 +<br>SBS25  | SBS18=0;<br>SBS25=1       | 0.71986 | SBS3 +<br>SBS15  | SBS3=0.89;<br>SBS15=0.11  | 0.82079 | SBS12 +<br>SBS18 | SBS12=0.84;<br>SBS18=0.16 | 0.8105  | SBS9 +<br>SBS38  | SBS9=0.94;<br>SBS38=0.06 | 0.68465 |
| SBS19 +<br>SBS25  | SBS19=0;<br>SBS25=1       | 0.71986 | SBS3 +<br>SBS7b  | SBS3=0.89;<br>SBS7b=0.11  | 0.82037 | SBS12 +<br>SBS42 | SBS12=0.84;<br>SBS42=0.16 | 0.80975 | SBS9 +<br>SBS52  | SBS9=0.95;<br>SBS52=0.05 | 0.68463 |
| SBS20 +<br>SBS25  | SBS20=0;<br>SBS25=1       | 0.71986 | SBS3 +<br>SBS42  | SBS3=0.8;<br>SBS42=0.2    | 0.82002 | SBS26 +<br>SBS39 | SBS26=0.82;<br>SBS39=0.18 | 0.80972 | SBS9 +<br>SBS58  | SBS9=0.89;<br>SBS58=0.11 | 0.68384 |
| SBS21 +<br>SBS25  | SBS21=0;<br>SBS25=1       | 0.71986 | SBS3 +<br>SBS24  | SBS3=0.8;<br>SBS24=0.2    | 0.81946 | SBS26 +<br>SBS50 | SBS26=0.89;<br>SBS50=0.11 | 0.80971 | SBS9 +<br>SBS54  | SBS9=0.93;<br>SBS54=0.07 | 0.68267 |
| SBS23 +<br>SBS25  | SBS23=0;<br>SBS25=1       | 0.71986 | SBS5 +<br>SBS7a  | SBS5=0.92;<br>SBS7a=0.08  | 0.81882 | SBS26 +<br>SBS45 | SBS26=0.93;<br>SBS45=0.07 | 0.80947 | SBS9 +<br>SBS53  | SBS9=0.94;<br>SBS53=0.06 | 0.68235 |
| SBS24 +<br>SBS25  | SBS24=0;<br>SBS25=1       | 0.71986 | SBS29 +<br>SBS30 | SBS29=0.53;<br>SBS30=0.47 | 0.81861 | SBS14 +<br>SBS26 | SBS14=0.08;<br>SBS26=0.92 | 0.80904 | SBS9 +<br>SBS60  | SBS9=0.97;<br>SBS60=0.03 | 0.6821  |
| SBS25 +<br>SBS26  | SBS25=1;<br>SBS26=0       | 0.71986 | SBS5 +<br>SBS56  | SBS5=0.93;<br>SBS56=0.07  | 0.81833 | SBS12 +<br>SBS22 | SBS12=0.87;<br>SBS22=0.13 | 0.80897 | SBS9 +<br>SBS11  | SBS9=0.94;<br>SBS11=0.06 | 0.68133 |

**Supplementary Table 15.** The 96 trinucleotide frequency for SBS Mongolia.

| <b>trinucleotide change</b> | <b>Relative contribution (SBS Mongolia)</b> |
|-----------------------------|---------------------------------------------|
| A[C>A]A                     | 0.035955461                                 |
| A[C>A]C                     | 0.013847095                                 |
| A[C>A]G                     | 0.001721218                                 |
| A[C>A]T                     | 0.004252817                                 |
| C[C>A]A                     | 0.014587099                                 |
| C[C>A]C                     | 0.012362044                                 |
| C[C>A]G                     | 0.00118355                                  |
| C[C>A]T                     | 0.003425482                                 |
| G[C>A]A                     | 0.014750146                                 |
| G[C>A]C                     | 0.004370825                                 |
| G[C>A]G                     | 0.001760215                                 |
| G[C>A]T                     | 0.008717436                                 |
| T[C>A]A                     | 0.01448695                                  |
| T[C>A]C                     | 0.035744186                                 |
| T[C>A]G                     | 0.005123383                                 |
| T[C>A]T                     | 0.018882905                                 |
| A[C>G]A                     | 0.006779861                                 |
| A[C>G]C                     | 0.002203666                                 |
| A[C>G]G                     | 0.001205332                                 |
| A[C>G]T                     | 0.017434403                                 |
| C[C>G]A                     | 0.006238753                                 |
| C[C>G]C                     | 0.004975743                                 |
| C[C>G]G                     | 0.004117009                                 |
| C[C>G]T                     | 0.007098419                                 |
| G[C>G]A                     | 0.001594505                                 |
| G[C>G]C                     | 4.75875E-20                                 |
| G[C>G]G                     | 0.000473898                                 |
| G[C>G]T                     | 0.003988173                                 |
| T[C>G]A                     | 0.003795465                                 |
| T[C>G]C                     | 0.004487134                                 |
| T[C>G]G                     | 0.001583128                                 |
| T[C>G]T                     | 0.023982606                                 |

|         |             |
|---------|-------------|
| A[C>T]A | 0.014945584 |
| A[C>T]C | 0.008389485 |
| A[C>T]G | 0.004551594 |
| A[C>T]T | 0.011651419 |
| C[C>T]A | 0.009402314 |
| C[C>T]C | 0.006496308 |
| C[C>T]G | 0.002564394 |
| C[C>T]T | 0.009626158 |
| G[C>T]A | 0.010533685 |
| G[C>T]C | 0.009922544 |
| G[C>T]G | 0.002524279 |
| G[C>T]T | 0.001925169 |
| T[C>T]A | 0.028736617 |
| T[C>T]C | 0.011600356 |
| T[C>T]G | 0.004565619 |
| T[C>T]T | 0.011004112 |
| A[T>A]A | 0.006363384 |
| A[T>A]C | 4.75875E-20 |
| A[T>A]G | 0.011583259 |
| A[T>A]T | 0.001046362 |
| C[T>A]A | 4.75875E-20 |
| C[T>A]C | 0.008078025 |
| C[T>A]G | 0.009598124 |
| C[T>A]T | 0.013844478 |
| G[T>A]A | 0.004196896 |
| G[T>A]C | 0.000210043 |
| G[T>A]G | 0.0048592   |
| G[T>A]T | 0.000784631 |
| T[T>A]A | 0.007414714 |
| T[T>A]C | 0.005257449 |
| T[T>A]G | 4.75875E-20 |
| T[T>A]T | 0.012157859 |
| A[T>C]A | 4.75875E-20 |
| A[T>C]C | 0.004967699 |

|         |             |
|---------|-------------|
| A[T>C]G | 0.030530339 |
| A[T>C]T | 6.78691E-16 |
| C[T>C]A | 0.004469143 |
| C[T>C]C | 0.011343202 |
| C[T>C]G | 0.009519282 |
| C[T>C]T | 0.004018189 |
| G[T>C]A | 0.000606475 |
| G[T>C]C | 1.49375E-11 |
| G[T>C]G | 0.002786154 |
| G[T>C]T | 0.004888446 |
| T[T>C]A | 0.009366417 |
| T[T>C]C | 0.000592396 |
| T[T>C]G | 0.001751501 |
| T[T>C]T | 0.014951023 |
| A[T>G]A | 0.027779096 |
| A[T>G]C | 0.020987142 |
| A[T>G]G | 0.056400253 |
| A[T>G]T | 0.045994861 |
| C[T>G]A | 0.007120867 |
| C[T>G]C | 0.00877218  |
| C[T>G]G | 0.01775835  |
| C[T>G]T | 0.037815563 |
| G[T>G]A | 0.00780353  |
| G[T>G]C | 0.003159935 |
| G[T>G]G | 0.014371422 |
| G[T>G]T | 0.012311793 |
| T[T>G]A | 0.019668356 |
| T[T>G]C | 0.014263082 |
| T[T>G]G | 0.037929245 |
| T[T>G]T | 0.053111095 |

**Supplementary Table 16.** Number of signature occurrences in the Mongolian and Western cohorts. Differences between Western samples from different origins (Europe and USA) are also indicated. Statistical differences between cohorts were assessed by Fisher test corrected by FDR.

|              | <b>Mongolian</b> | <b>% Mongolian</b> | <b>Western (all)</b> | <b>% Western (all)</b> | <b>adj. p val</b> | <b>Europe</b> | <b>% Europe</b> | <b>USA</b> | <b>% USA</b> | <b>adj. p val</b> |
|--------------|------------------|--------------------|----------------------|------------------------|-------------------|---------------|-----------------|------------|--------------|-------------------|
| <b>SBS1</b>  | 0                | 0.0%               | 0                    | 0.0%                   | 1.000             | 0             | 0.0%            | 0          | 0.0%         | NA                |
| <b>SBS4</b>  | 2                | 1.3%               | 2                    | 1.8%                   | 1.000             | 2             | 2.9%            | 0          | 0.0%         | 0.834             |
| <b>SBS5</b>  | 10               | 6.6%               | 13                   | 11.6%                  | 0.515             | 9             | 13.0%           | 4          | 9.3%         | 0.834             |
| <b>SBS6</b>  | 1                | 0.7%               | 0                    | 0.0%                   | 1.000             | 0             | 0.0%            | 0          | 0.0%         | NA                |
| <b>SBS12</b> | 2                | 1.3%               | 0                    | 0.0%                   | 0.800             | 0             | 0.0%            | 0          | 0.0%         | NA                |
| <b>SBS16</b> | 0                | 0.0%               | 2                    | 1.8%                   | 0.515             | 2             | 2.9%            | 0          | 0.0%         | 0.834             |
| <b>SBS18</b> | 0                | 0.0%               | 1                    | 0.9%                   | 0.781             | 0             | 0.0%            | 1          | 2.3%         | 0.834             |
| <b>SBS22</b> | 21               | 13.9%              | 6                    | 5.4%                   | 0.137             | 0             | 0.0%            | 6          | 14.0%        | 0.018             |
| <b>SBS26</b> | 3                | 2.0%               | 0                    | 0.0%                   | 0.580             | 0             | 0.0%            | 0          | 0.0%         | NA                |
| <b>SBS29</b> | 1                | 0.7%               | 0                    | 0.0%                   | 1.000             | 0             | 0.0%            | 0          | 0.0%         | NA                |
| <b>SBS40</b> | 49               | 32.5%              | 33                   | 29.5%                  | 0.944             | 21            | 30.4%           | 12         | 27.9%        | 0.834             |
| <b>SBSM</b>  | 38               | 25.2%              | 5                    | 4.5%                   | 0.00003           | 4             | 5.8%            | 1          | 2.3%         | 0.834             |

**Supplementary Table 17.** Frequency of occurrence of COSMIC and de novo mutational signatures in the external NCI Mongolian, and Korean HCC cohorts. Statistical differences compared to the in-house Mongolian cohorts were assessed by Fisher test corrected by FDR.

|              | <b>NCI</b> | <b>% NCI</b> | <b>adj. p-val</b> | <b>Korean</b> | <b>% Korean</b> | <b>adj. p-val</b> |
|--------------|------------|--------------|-------------------|---------------|-----------------|-------------------|
| <b>SBS1</b>  | 2          | 2.8%         | 0.171             | 0             | 0%              | NA                |
| <b>SBS4</b>  | 3          | 4.2%         | 0.441             | 36            | 15.6%           | 0.000             |
| <b>SBS5</b>  | 27         | 38.0%        | 0.000             | 28            | 12.1%           | 0.153             |
| <b>SBS6</b>  | 1          | 1.4%         | 0.587             | 0             | 0.0%            | 0.435             |
| <b>SBS12</b> | 18         | 25.4%        | 0.000             | 10            | 4.3%            | 0.213             |
| <b>SBS16</b> | 25         | 35.2%        | 0.000             | 81            | 35.1%           | 0.000             |
| <b>SBS18</b> | 12         | 16.9%        | 0.000             | 28            | 12.1%           | 0.000             |
| <b>SBS22</b> | 10         | 14.1%        | 1.000             | 23            | 10.0%           | 0.349             |
| <b>SBS26</b> | 5          | 7.0%         | 0.171             | 2             | 0.9%            | 0.435             |
| <b>SBS29</b> | 3          | 4.2%         | 0.171             | 2             | 0.9%            | 1.000             |
| <b>SBS40</b> | 53         | 74.6%        | 0.000             | 120           | 51.9%           | 0.000             |
| <b>SBSM</b>  | 22         | 31.0%        | 0.502             | 10            | 4.3%            | 0.000             |



**Supplementary Table 18.** Number of environmental signature occurrences in the Mongolian and Western cohorts. Differences between Western samples from different origins (Europe and USA) are also indicated. Statistical differences between cohorts were assessed by Fisher test corrected by FDR.

|                                   | Mongolian | % Mongolian | Western | % Western | adj. p val | Europe | % Europe | USA | % USA | adj. p val |
|-----------------------------------|-----------|-------------|---------|-----------|------------|--------|----------|-----|-------|------------|
| MNU_350_uM                        | 61        | 40.4%       | 41      | 36.6%     | 0.799      | 28     | 40.6%    | 13  | 30.2% | 0.858      |
| DMS_0_078_mM                      | 57        | 37.7%       | 21      | 18.8%     | 0.0419     | 14     | 20.3%    | 7   | 16.3% | 1.000      |
| AFB1_0_25_uM_plus_S9              | 46        | 30.5%       | 24      | 21.4%     | 0.4615     | 17     | 24.6%    | 7   | 16.3% | 0.858      |
| DES_0_938_mM                      | 42        | 27.8%       | 33      | 29.5%     | 0.9406     | 23     | 33.3%    | 10  | 23.3% | 0.858      |
| DMH_11_6_mM_plus_S9               | 36        | 23.8%       | 32      | 28.6%     | 0.7154     | 19     | 27.5%    | 13  | 30.2% | 1.000      |
| ENU_400_uM                        | 36        | 23.8%       | 23      | 20.5%     | 0.7815     | 13     | 18.8%    | 10  | 23.3% | 1.000      |
| Formaldehyde_120_uM               | 29        | 19.2%       | 32      | 28.6%     | 0.4130     | 19     | 27.5%    | 13  | 30.2% | 1.000      |
| S_6_Nitrochrysene_12_5_uM_plus_S9 | 29        | 19.2%       | 31      | 27.7%     | 0.463      | 19     | 27.5%    | 12  | 27.9% | 1.000      |
| DBP_0_0039_uM                     | 27        | 17.9%       | 12      | 10.7%     | 0.4615     | 7      | 10.1%    | 5   | 11.6% | 1.000      |
| AZD7762_1_625_uM                  | 23        | 15.2%       | 13      | 11.6%     | 0.7588     | 4      | 5.8%     | 9   | 20.9% | 0.384      |
| Mechlorethamine_0_3_uM            | 22        | 14.6%       | 21      | 18.8%     | 0.7154     | 12     | 17.4%    | 9   | 20.9% | 1.000      |
| Methyleugenol_1_25_mM             | 21        | 13.9%       | 14      | 12.5%     | 0.997      | 10     | 14.5%    | 4   | 9.3%  | 1.000      |
| S_1_8_DNP_8_uM                    | 20        | 13.2%       | 10      | 8.9%      | 0.6916     | 6      | 8.7%     | 4   | 9.3%  | 1.000      |
| AAII_37_5_uM                      | 18        | 11.9%       | 18      | 16.1%     | 0.7154     | 13     | 18.8%    | 5   | 11.6% | 0.907      |
| Temozolomide_200_uM               | 11        | 7.3%        | 16      | 14.3%     | 0.4608     | 13     | 18.8%    | 3   | 7.0%  | 0.789      |
| S_6_Nitrochrysene_50_uM_plus_S9   | 10        | 6.6%        | 2       | 1.8%      | 0.4130     | 0      | 0.0%     | 2   | 4.7%  | 0.789      |
| S_5_Methylchrysene_1_6_uM_plus_S9 | 9         | 6.0%        | 5       | 4.5%      | 0.9406     | 2      | 2.9%     | 3   | 7.0%  | 0.858      |
| Furan_100_mM_plus_S9              | 7         | 4.6%        | 3       | 2.7%      | 0.7815     | 3      | 4.3%     | 0   | 0.0%  | 0.858      |
| DBPDE_0_000625_uM                 | 7         | 4.6%        | 1       | 0.9%      | 0.463      | 1      | 1.4%     | 0   | 0.0%  | 1.000      |
| MX_7_uM_plus_S9                   | 5         | 3.3%        | 11      | 9.8%      | 0.3722     | 7      | 10.1%    | 4   | 9.3%  | 1.000      |
| OTA_0_08_uM_plus_S9               | 5         | 3.3%        | 6       | 5.4%      | 0.7815     | 4      | 5.8%     | 2   | 4.7%  | 1.000      |
| AAI_1_25_uM                       | 4         | 2.6%        | 4       | 3.6%      | 0.9246     | 0      | 0.0%     | 4   | 9.3%  | 0.384      |
| S_1_8_DNP_0_125_uM                | 2         | 1.3%        | 1       | 0.9%      | 1          | 1      | 1.4%     | 0   | 0.0%  | 1.000      |
| SSR_1_25_J                        | 2         | 1.3%        | 10      | 8.9%      | 0.1081     | 6      | 8.7%     | 4   | 9.3%  | 1.000      |
| S_3_NBA_0_1_uM                    | 2         | 1.3%        | 2       | 1.8%      | 1          | 2      | 2.9%     | 0   | 0.0%  | 0.993      |
| DBPDE_0_000156_uM                 | 1         | 0.7%        | 0       | 0.0%      | 1          | 0      | 0.0%     | 0   | 0.0%  | NA         |
| DBP_0_0313_uM_plus_S9             | 1         | 0.7%        | 0       | 0.0%      | 1          | 0      | 0.0%     | 0   | 0.0%  | NA         |
| Benzidine_200_uM                  | 1         | 0.7%        | 2       | 1.8%      | 0.7815     | 0      | 0.0%     | 2   | 4.7%  | 0.789      |
| Cyclophosphamide_18_75_uM_plus_S9 | 1         | 0.7%        | 3       | 2.7%      | 0.6916     | 3      | 4.3%     | 0   | 0.0%  | 0.858      |
| Potassium bromate_260_uM          | 1         | 0.7%        | 3       | 2.7%      | 0.6916     | 3      | 4.3%     | 0   | 0.0%  | 0.858      |
| S_6_Nitrochrysene_0_78_uM         | 1         | 0.7%        | 0       | 0.0%      | 1          | 0      | 0.0%     | 0   | 0.0%  | NA         |
| S_1_6_DNP_0_09_uM                 | 1         | 0.7%        | 2       | 1.8%      | 0.7815     | 0      | 0.0%     | 2   | 4.7%  | 0.789      |
| N_Nitrosopyrrolidine_50_mM        | 1         | 0.7%        | 0       | 0.0%      | 1          | 0      | 0.0%     | 0   | 0.0%  | NA         |
| Cisplatin_3_125_uM                | 1         | 0.7%        | 3       | 2.7%      | 0.6916     | 3      | 4.3%     | 0   | 0.0%  | 0.858      |
| Carboplatin_5_uM                  | 1         | 0.7%        | 6       | 5.4%      | 0.3722     | 1      | 1.4%     | 5   | 11.6% | 0.384      |
| S_6_Nitrochrysene_50_uM           | 1         | 0.7%        | 4       | 3.6%      | 0.4736     | 4      | 5.8%     | 0   | 0.0%  | 0.858      |
| DBADE_0_109_uM                    | 0         | 0.0%        | 0       | 0.0%      | 1          | 0      | 0.0%     | 0   | 0.0%  | NA         |
| Potassium bromate_875_uM          | 0         | 0.0%        | 0       | 0.0%      | 1          | 0      | 0.0%     | 0   | 0.0%  | NA         |
| S_4_ABP_300_uM_plus_S9            | 0         | 0.0%        | 5       | 4.5%      | 0.1861     | 3      | 4.3%     | 2   | 4.7%  | 1.000      |
| Semustine_150_uM                  | 0         | 0.0%        | 2       | 1.8%      | 0.4736     | 1      | 1.4%     | 1   | 2.3%  | 1.000      |
| DBADE_0_0313_uM                   | 0         | 0.0%        | 0       | 0.0%      | 1          | 0      | 0.0%     | 0   | 0.0%  | NA         |
| BPDE_0_125_uM                     | 0         | 0.0%        | 0       | 0.0%      | 1          | 0      | 0.0%     | 0   | 0.0%  | NA         |
| BaP_0_39_uM_plus_S9               | 0         | 0.0%        | 0       | 0.0%      | 1          | 0      | 0.0%     | 0   | 0.0%  | NA         |
| Ellipticine_0_375_uM_plus_S9      | 0         | 0.0%        | 3       | 2.7%      | 0.4130     | 2      | 2.9%     | 1   | 2.3%  | 1.000      |
| DBA_75_uM_plus_S9                 | 0         | 0.0%        | 0       | 0.0%      | 1          | 0      | 0.0%     | 0   | 0.0%  | NA         |
| PhIP_3_uM_plus_S9                 | 0         | 0.0%        | 0       | 0.0%      | 1          | 0      | 0.0%     | 0   | 0.0%  | NA         |
| S_3_NBA_0_025_uM                  | 0         | 0.0%        | 0       | 0.0%      | 1          | 0      | 0.0%     | 0   | 0.0%  | NA         |

|                       |   |      |   |      |        |   |      |   |      |       |
|-----------------------|---|------|---|------|--------|---|------|---|------|-------|
| Propylene_oxide_10_mM | 0 | 0.0% | 2 | 1.8% | 0.4736 | 2 | 2.9% | 0 | 0.0% | 0.993 |
| DBAC_5_uM_plus_S9     | 0 | 0.0% | 0 | 0.0% | 1      | 0 | 0.0% | 0 | 0.0% | NA    |
| Cisplatin_12_5_uM     | 0 | 0.0% | 1 | 0.9% | 0.7154 | 0 | 0.0% | 1 | 2.3% | 0.858 |
| PhIP_4_uM_plus_S9     | 0 | 0.0% | 1 | 0.9% | 0.7154 | 1 | 1.4% | 0 | 0.0% | 1.000 |
| BaP_2_uM_plus_S9      | 0 | 0.0% | 0 | 0.0% | 1      | 0 | 0.0% | 0 | 0.0% | NA    |

**Supplementary Table 19.** Frequency of environmental signature occurrences in the external NCI Mongolian, and Korean HCC cohorts. Statistical differences between cohorts were assessed by Fisher test corrected by FDR.

|                                   | adj.<br>p val | NCI | % NCI  | adj.<br>p val | Korea | %<br>Korea | adj.<br>p val |
|-----------------------------------|---------------|-----|--------|---------------|-------|------------|---------------|
| MNU_350_uM                        | 0.799         | 20  | 28.17% | 0.593         | 44    | 19.0%      | 0.000         |
| DMS_0_078_mM                      | 0.042         | 17  | 23.94% | 0.593         | 28    | 12.1%      | 0.000         |
| AFB1_0_25_uM_plusS9               | 0.462         | 20  | 28.17% | 1.000         | 0     | 0.0%       | NA            |
| DES_0_938_mM                      | 0.941         | 13  | 18.31% | 0.702         | 39    | 16.9%      | 0.055         |
| DMH_11_6_mM_plusS9                | 0.715         | 22  | 30.99% | 0.742         | 0     | 0.0%       | NA            |
| ENU_400_uM                        | 0.782         | 18  | 25.35% | 1.000         | 46    | 19.9%      | 0.625         |
| Formaldehyde_120uM                | 0.413         | 14  | 19.72% | 1.000         | 0     | 0.0%       | NA            |
| S_6_Nitrochrysene_12_5_uM_plusS9  | 0.463         | 17  | 23.94% | 0.912         | 0     | 0.0%       | NA            |
| DBP_0_0039_uM                     | 0.462         | 7   | 9.86%  | 0.704         | 9     | 3.9%       | 0.000         |
| AZD7762_1_625_uM                  | 0.759         | 11  | 15.49% | 1.000         | 21    | 9.1%       | 0.223         |
| Mechlorethamine_0_3uM             | 0.715         | 16  | 22.54% | 0.704         | 0     | 0.0%       | NA            |
| Methyleugenol_1_25mM              | 0.997         | 17  | 23.94% | 0.593         | 0     | 0.0%       | NA            |
| S_1_8_DNP_8_uM                    | 0.692         | 10  | 14.08% | 1.000         | 10    | 4.3%       | 0.016         |
| AAI_37_5_uM                       | 0.715         | 8   | 11.27% | 1.000         | 35    | 15.2%      | 0.673         |
| Temozolomide_200_uM               | 0.461         | 3   | 4.23%  | 0.912         | 41    | 17.7%      | 0.017         |
| S_6_Nitrochrysene_50_uM_plusS9    | 0.413         | 2   | 2.82%  | 0.747         | 0     | 0.0%       | NA            |
| S_5_Methylchrysene_1_6_uM_plusS9  | 0.941         | 2   | 2.82%  | 0.912         | 0     | 0.0%       | NA            |
| Furan_100_mM_plusS9               | 0.782         | 5   | 7.04%  | 0.912         | 0     | 0.0%       | NA            |
| DBPDE_0_000625_uM                 | 0.463         | 1   | 1.41%  | 0.904         | 6     | 2.6%       | 0.625         |
| MX_7_uM_plus_S9                   | 0.372         | 2   | 2.82%  | 1.000         | 18    | 7.8%       | 0.234         |
| OTA_0_08_uM_plus_S9               | 0.782         | 5   | 7.04%  | 0.742         | 15    | 6.5%       | 0.429         |
| AAI_1_25_uM                       | 0.925         | 1   | 1.41%  | 1.000         | 21    | 9.1%       | 0.064         |
| S_1_8_DNP_0_125_uM                | 1.000         | 1   | 1.41%  | 1.000         | 0     | 0.0%       | 0.304         |
| SSR_1_25_J                        | 0.108         | 4   | 5.63%  | 0.593         | 7     | 3.0%       | 0.673         |
| S_3_NBA_0_1_uM                    | 1.000         | 2   | 2.82%  | 0.938         | 15    | 6.5%       | 0.066         |
| DBPDE_0_000156_uM                 | 1.000         | 0   | 0.00%  | 1.000         | 4     | 1.7%       | 0.779         |
| DBP_0_0313_uM_plusS9              | 1.000         | 0   | 0.00%  | 1.000         | 0     | 0.0%       | NA            |
| Benzidine_200_uM                  | 0.782         | 0   | 0.00%  | 1.000         | 14    | 6.1%       | 0.029         |
| Cyclophosphamide_18_7_5_uM_plusS9 | 0.692         | 0   | 0.00%  | 1.000         | 0     | 0.0%       | NA            |
| Potassium_br_260uM                | 0.692         | 2   | 2.82%  | 0.704         | 0     | 0.0%       | NA            |
| S_6_Nitrochrysene_0_78_uM         | 1.000         | 1   | 1.41%  | 0.912         | 0     | 0.0%       | NA            |
| S_1_6_DNP_0_09_uM                 | 0.782         | 0   | 0.00%  | 1.000         | 2     | 0.9%       | 1.000         |
| N_Nitrosopyrrolidine_50_mM        | 1.000         | 2   | 2.82%  | 0.704         | 0     | 0.0%       | NA            |
| Cisplatin_3_125_uM                | 0.692         | 0   | 0.00%  | 1.000         | 1     | 0.4%       | 1.000         |
| Carboplatin_5_uM                  | 0.372         | 2   | 2.82%  | 0.704         | 2     | 0.9%       | 1.000         |
| S_6_Nitrochrysene_50uM            | 0.474         | 2   | 2.82%  | 0.704         | 0     | 0.0%       | NA            |
| DBADE_0_109_uM                    | 1.000         | 0   | 0.00%  | NA            | 2     | 0.9%       | 0.673         |
| Potassium_bromate_875_uM          | 1.000         | 0   | 0.00%  | NA            | 0     | 0.0%       | NA            |
| S_4_ABP_300uM_plusS9              | 0.186         | 1   | 1.41%  | 0.742         | 0     | 0.0%       | NA            |
| Semustine_150uM                   | 0.474         | 1   | 1.41%  | 0.742         | 0     | 0.0%       | NA            |
| DBADE_0_0313_uM                   | 1.000         | 0   | 0.00%  | NA            | 2     | 0.9%       | 0.673         |
| BPDE_0_125_uM                     | 1.000         | 0   | 0.00%  | NA            | 0     | 0.0%       | NA            |

|                                     |       |   |       |       |    |       |       |
|-------------------------------------|-------|---|-------|-------|----|-------|-------|
| <b>BaP_0_39_uM_plus_S9</b>          | 1.000 | 0 | 0.00% | NA    | 0  | 0.0%  | NA    |
| <b>Ellipticine_0_375_uM_plus_S9</b> | 0.413 | 0 | 0.00% | NA    | 0  | 0.0%  | NA    |
| <b>DBA_75_uM_plus_S9</b>            | 1.000 | 0 | 0.00% | NA    | 0  | 0.0%  | NA    |
| <b>PhIP_3_uM_plus_S9</b>            | 1.000 | 0 | 0.00% | NA    | 0  | 0.0%  | NA    |
| <b>S_3_NBA_0_025_uM</b>             | 1.000 | 2 | 2.82% | 0.593 | 25 | 10.8% | 0.000 |
| <b>Propylene_oxide_1_mM</b>         | 0.474 | 2 | 2.82% | 0.593 | 0  | 0.0%  | NA    |
| <b>DBAC_5_uM_plus_S9</b>            | 1.000 | 0 | 0.00% | NA    | 0  | 0.0%  | NA    |
| <b>Cisplatin_12_5_uM</b>            | 0.715 | 0 | 0.00% | NA    | 1  | 0.4%  | 1.000 |
| <b>PhIP_4_uM_plus_S9</b>            | 0.715 | 2 | 2.82% | 0.593 | 0  | 0.0%  | NA    |
| <b>BaP_2_uM_plus_S9</b>             | 1.000 | 0 | 0.00% | NA    | 0  | 0.0%  | NA    |

**Supplementary Table 20.** Clinico-pathological characteristics of the Mongolian gene expression-based clusters in the Mongolian cohort.

|                                   | <b>MGL1</b><br>(n=47, 44%) | <b>MGL2</b><br>(n=27, 26%) | <b>MGL3</b><br>(n=32, 30%) | <b>p value</b> |
|-----------------------------------|----------------------------|----------------------------|----------------------------|----------------|
| Age (years)                       | 62 (43-76)                 | 56 (44-72)                 | 56 (41-75)                 | 0.028          |
| <60 years (n, %)                  | 18 (39.1)                  | 20 (76.9)                  | 19 (63.3)                  | 0.005          |
| Gender (male, %)                  | 29 (63)                    | 8 (30.8)                   | 19 (63.3)                  | 0.017          |
| BMI > 25 kg/m <sup>2</sup> (n, %) | 26 (56.5)                  | 12 (46.2)                  | 11 (39.3)                  | ns             |
| Etiology:                         |                            |                            |                            |                |
| • HBV (n, %)                      | 4 (8.5)                    | 0 (0)                      | 0 (0)                      | <0.001         |
| • HBV/HDV (n, %)                  | 27 (57.4)                  | 19 (70.4)                  | 26 (81.3)                  |                |
| • HBV/HCV/HDV (n, %)              | 1 (2.1)                    | 6 (22.2)                   | 5 (15.6)                   |                |
| • HCV (n, %)                      | 15 (31.9)                  | 2 (7.4)                    | 1 (3.1)                    |                |
| Region                            |                            |                            |                            |                |
| • Western (n, %)                  | 9 (20.5)                   | 6 (26.1)                   | 4 (14.8)                   | ns             |
| • Central (n, %)                  | 18 (40.9)                  | 9 (39.1)                   | 13 (48.1)                  |                |
| • Eastern (n, %)                  | 1 (2.3)                    | 3 (13)                     | 3 (11.1)                   |                |
| • Ulaanbaatar (n, %)              | 16 (36.4)                  | 5 (21.7)                   | 7 (25.9)                   |                |
| BCLC stage (0-A, %)               | 35 (77.8)                  | 17 (68)                    | 24 (85.7)                  | ns             |
| AFP >400 IU/mL (n, %)             | 5 (13.5)                   | 9 (42.9)                   | 4 (16.7)                   | 0.026          |
| Liver fibrosis (F3-4, %)          | 17 (36.2)                  | 12 (44.4)                  | 12 (37.5)                  | ns             |
| Microvascular invasion (yes, %)   | 16 (41)                    | 13 (65)                    | 9 (34.6)                   | 0.099          |
| Tumor grade (G3-4, %)             | 4 (10)                     | 4 (26.7)                   | 0 (0)                      | 0.045          |

BMI, body mass index; HBV, hepatitis B virus; HCV, hepatitis C virus; HDV, hepatitis delta virus; BCLC, Barcelona Clinic Liver Cancer, AFP, alfa-fetoprotein

Some variables have missing values for MGL1, MGL2 and MGL3, respectively:

Age, gender: 1, 1, and 2 patients. BMI: 1, 1, and 4 patients. Region: 3, 4, and 5 patients. BCLC stage: 2, 2, and 4 patients. AFP: 10, 6, and 8 patients. Microvascular invasion: 8, 7, and 8 patients. Tumor grade: 7, 12, and 16 patients.

**Supplementary Table 21.** Pathways enriched in MGL1 cluster according to gene set enrichment analysis (GSEA).

| NAME                                                                              | MSigDB   | ES    | NES   | NOM p-val | FDR q-val |
|-----------------------------------------------------------------------------------|----------|-------|-------|-----------|-----------|
| HALLMARK_BILE_ACID_METABOLISM                                                     | Hallmark | 0.548 | 2.256 | 0.000     | 0.000     |
| CHIANG_LIVER_CANCER_SUBCLASS_PROLIFERATION_DN                                     | C2       | 0.716 | 3.167 | 0.000     | 0.000     |
| CHIANG_LIVER_CANCER_SUBCLASS_CTNNB1_UP                                            | C2       | 0.718 | 3.119 | 0.000     | 0.000     |
| LEE_LIVER_CANCER_SURVIVAL_UP                                                      | C2       | 0.699 | 3.060 | 0.000     | 0.000     |
| WOO_LIVER_CANCER_RECURRENCE_DN                                                    | C2       | 0.758 | 2.929 | 0.000     | 0.000     |
| BOYALT_LIVER_CANCER_SUBCLASS_G123_DN                                              | C2       | 0.735 | 2.597 | 0.000     | 0.000     |
| KIM_LIVER_CANCER_POOR_SURVIVAL_DN                                                 | C2       | 0.730 | 2.490 | 0.000     | 0.000     |
| CHIANG_LIVER_CANCER_SUBCLASS_INTERFERON_DN                                        | C2       | 0.689 | 2.482 | 0.000     | 0.000     |
| BOYALT_LIVER_CANCER_SUBCLASS_G6_UP                                                | C2       | 0.630 | 2.458 | 0.000     | 0.000     |
| HOSHIDA_LIVER_CANCER_SUBCLASS_S3                                                  | C2       | 0.496 | 2.310 | 0.000     | 0.000     |
| LEE_LIVER_CANCER_DENA_DN                                                          | C2       | 0.579 | 2.179 | 0.000     | 0.001     |
| HSIAO_LIVER_SPECIFIC_GENES                                                        | C2       | 0.479 | 2.184 | 0.000     | 0.001     |
| MINGUEZ_LIVER_CANCER_VASCULAR_INVASION_DN                                         | C2       | 0.731 | 2.146 | 0.000     | 0.001     |
| NIKOLSKY_BREAST_CANCER_1Q21_AMPLICON                                              | C2       | 0.637 | 2.155 | 0.000     | 0.001     |
| KEGG_GLYCINE_SERINE_AND_THREONINE_METABOLISM                                      | C2       | 0.654 | 2.141 | 0.000     | 0.001     |
| ANDERSEN_LIVER_CANCER_KRT19_DN                                                    | C2       | 0.557 | 2.124 | 0.000     | 0.001     |
| CHIANG_LIVER_CANCER_SUBCLASS_POLYSOMY7_UP                                         | C2       | 0.548 | 2.112 | 0.000     | 0.001     |
| REACTOME_PEROXISOMAL_PROTEIN_IMPORT                                               | C2       | 0.575 | 2.098 | 0.000     | 0.001     |
| VILLANUEVA_LIVER_CANCER_KRT19_DN                                                  | C2       | 0.552 | 2.066 | 0.000     | 0.002     |
| BOYALT_LIVER_CANCER_SUBCLASS_G3_DN                                                | C2       | 0.572 | 2.057 | 0.000     | 0.003     |
| KEGG_PRIMARY_BILE_ACID_BIOSYNTHESIS                                               | C2       | 0.742 | 2.046 | 0.002     | 0.003     |
| OHGUCHI_LIVER_HNF4A_TARGETS_DN                                                    | C2       | 0.470 | 2.017 | 0.000     | 0.004     |
| REACTOME_GLYOXYLATE_METABOLISM_AND_GLYCINE_DEGRADATION                            | C2       | 0.633 | 2.007 | 0.000     | 0.005     |
| KEGG_PEROXISOME                                                                   | C2       | 0.512 | 1.994 | 0.000     | 0.006     |
| REACTOME_SYNTHESIS_OF_BILE_ACIDS_AND_BILE_SALTS_VIA_7ALPHA_HYDROXYCHOLESTEROL     | C2       | 0.660 | 1.995 | 0.000     | 0.006     |
| YAMASHITA_LIVER_CANCER_WITH_EPCAM_DN                                              | C2       | 0.714 | 1.937 | 0.000     | 0.011     |
| REACTOME_BILE_ACID_AND_BILE_SALT_METABOLISM                                       | C2       | 0.569 | 1.937 | 0.002     | 0.012     |
| LAIHO_COLORECTAL_CANCER_SERRATED_DN                                               | C2       | 0.491 | 1.922 | 0.000     | 0.013     |
| GINESTIER_BREAST_CANCER_ZNF217_AMPLIFIED_DN                                       | C2       | 0.413 | 1.918 | 0.000     | 0.013     |
| REACTOME_RECYCLING_OF_BILE_ACIDS_AND_SALTS                                        | C2       | 0.711 | 1.908 | 0.002     | 0.014     |
| REACTOME_BIOLOGICAL_OXIDATIONS                                                    | C2       | 0.417 | 1.873 | 0.000     | 0.021     |
| KEGG_STEROID_HORMONE_BIOSYNTHESIS                                                 | C2       | 0.516 | 1.839 | 0.000     | 0.027     |
| REACTOME_PEROXISOMAL_LIPID_METABOLISM                                             | C2       | 0.574 | 1.844 | 0.002     | 0.028     |
| YAMASHITA_LIVER_CANCER_STEM_CELL_DN                                               | C2       | 0.473 | 1.840 | 0.002     | 0.028     |
| REACTOME_PHASE_I_FUNCTIONALIZATION_OF_COMPOUNDS                                   | C2       | 0.442 | 1.844 | 0.000     | 0.029     |
| MOOTHA_FFA_OXYDATION                                                              | C2       | 0.643 | 1.833 | 0.005     | 0.029     |
| BOYALT_LIVER_CANCER_SUBCLASS_G12_DN                                               | C2       | 0.685 | 1.828 | 0.012     | 0.029     |
| REACTOME_SYNTHESIS_OF_BILE_ACIDS_AND_BILE_SALTS                                   | C2       | 0.554 | 1.820 | 0.005     | 0.031     |
| BIOCARTA_NUCLEARRS_PATHWAY                                                        | C2       | 0.550 | 1.810 | 0.000     | 0.033     |
| LEE_LIVER_CANCER_ACOX1_DN                                                         | C2       | 0.481 | 1.812 | 0.000     | 0.033     |
| LEE_LIVER_CANCER_CIPROFIBRATE_DN                                                  | C2       | 0.486 | 1.807 | 0.003     | 0.033     |
| REACTOME_SULFUR_AMINO_ACID_METABOLISM                                             | C2       | 0.610 | 1.797 | 0.005     | 0.036     |
| WENG_POR_TARGETS_GLOBAL_UP                                                        | C2       | 0.653 | 1.792 | 0.007     | 0.036     |
| REACTOME_TRANSPORT_OF_BILE_SALTS_AND_ORGANIC_ACIDS_METAL_IONS_AND_AMINE_COMPOUNDS | C2       | 0.445 | 1.765 | 0.000     | 0.047     |

**Supplementary Table 22.** Pathways enriched in MGL2 cluster according to gene set enrichment analysis (GSEA).

| NAME                                              | MSigDB   | ES     | NES    | NOM p-val | FDR q-val |
|---------------------------------------------------|----------|--------|--------|-----------|-----------|
| HALLMARK_G2M_CHECKPOINT                           | Hallmark | -0.379 | -1.718 | 0.000     | 0.015     |
| HALLMARK_MITOTIC_SPINDLE                          | Hallmark | -0.382 | -1.705 | 0.000     | 0.009     |
| GINESTIER_BREAST_CANCER_20Q13_AMPLIFICATION_DN    | C2       | -0.573 | -2.524 | 0.000     | 0.000     |
| CHIANG_LIVER_CANCER_SUBCLASS_PROLIFERATION_UP     | C2       | -0.550 | -2.461 | 0.000     | 0.000     |
| GINESTIER_BREAST_CANCER_ZNF217_AMPLIFIED_DN       | C2       | -0.508 | -2.418 | 0.000     | 0.000     |
| WHITFIELD_CELL_CYCLE_G1_S                         | C2       | -0.557 | -2.344 | 0.000     | 0.000     |
| VILLANUEVA_LIVER_CANCER_KRT19_UP                  | C2       | -0.521 | -2.332 | 0.000     | 0.000     |
| PYEON_CANCER_HEAD_AND_NECK_VS_CERVICAL_UP         | C2       | -0.522 | -2.326 | 0.000     | 0.000     |
| WHITFIELD_CELL_CYCLE_S                            | C2       | -0.518 | -2.254 | 0.000     | 0.000     |
| CHIANG_LIVER_CANCER_SUBCLASS_CTNNB1_DN            | C2       | -0.497 | -2.196 | 0.000     | 0.001     |
| ROSTY_CERVICAL_CANCER_PROLIFERATION_CLUSTER       | C2       | -0.514 | -2.193 | 0.000     | 0.001     |
| PYEON_HPV_POSITIVE_TUMORS_UP                      | C2       | -0.541 | -2.187 | 0.000     | 0.001     |
| REACTOME_RESOLUTION_OF_D_LOOP_STRUCTURES          | C2       | -0.645 | -2.110 | 0.000     | 0.004     |
| LEE_DIFFERENTIATING_T_LYMPHOCYTE                  | C2       | -0.468 | -2.063 | 0.000     | 0.008     |
| DUTERTRE ESTRADIOL_RESPONSE_24HR_UP               | C2       | -0.428 | -2.035 | 0.000     | 0.011     |
| KEGG_PHOSPHATIDYLINOSITOL_SIGNALING_SYSTEM        | C2       | -0.522 | -2.024 | 0.000     | 0.011     |
| KANG_DOXORUBICIN_RESISTANCE_UP                    | C2       | -0.544 | -1.993 | 0.000     | 0.017     |
| LAIHO_COLORECTAL_CANCER_SERRATED_DN               | C2       | -0.497 | -1.949 | 0.000     | 0.029     |
| CHIANG_LIVER_CANCER_SUBCLASS_UNANNOTATED_UP       | C2       | -0.483 | -1.942 | 0.000     | 0.030     |
| ZHAN_MULTIPLE_MYELOMA_PR_UP                       | C2       | -0.565 | -1.933 | 0.000     | 0.031     |
| REACTOME_HDR_THROUGH_HOMOLOGOUS_RECOMBINATION_HRR | C2       | -0.514 | -1.916 | 0.000     | 0.037     |
| XU_HGF_TARGETS_INDUCED_BY_AKT1_48HR_DN            | C2       | -0.650 | -1.909 | 0.010     | 0.039     |
| HOEBEKE_LYMPHOID_STEM_CELL_UP                     | C2       | -0.481 | -1.904 | 0.000     | 0.040     |

**Supplementary Table 23.** Pathways enriched in MGL3 cluster according to gene set enrichment analysis (GSEA).

| NAME                                                                                      | MSigDB   | ES     | NES    | NOM p-val | FDR q-val |
|-------------------------------------------------------------------------------------------|----------|--------|--------|-----------|-----------|
| HALLMARK_EPITHELIAL_MESENCHYMAL_TRANSITION                                                | Hallmark | -0.707 | -3.128 | 0.000     | 0.000     |
| HALLMARK_ALLOGRAFT_REJECTION                                                              | Hallmark | -0.618 | -2.743 | 0.000     | 0.000     |
| HALLMARK_INFLAMMATORY_RESPONSE                                                            | Hallmark | -0.579 | -2.576 | 0.000     | 0.000     |
| HALLMARK_KRAS_SIGNALING_UP                                                                | Hallmark | -0.572 | -2.522 | 0.000     | 0.000     |
| HALLMARK_COMPLEMENT                                                                       | Hallmark | -0.501 | -2.236 | 0.000     | 0.000     |
| HALLMARK_TNFA_SIGNALING_VIA_NFKB                                                          | Hallmark | -0.495 | -2.231 | 0.000     | 0.000     |
| HALLMARK_IL2_STAT5_SIGNALING                                                              | Hallmark | -0.496 | -2.228 | 0.000     | 0.000     |
| HALLMARK_ANGIOGENESIS                                                                     | Hallmark | -0.659 | -2.163 | 0.000     | 0.000     |
| HALLMARK_TGF_BETA_SIGNALING                                                               | Hallmark | -0.541 | -1.926 | 0.000     | 0.000     |
| HALLMARK_INTERFERON_GAMMA_RESPONSE                                                        | Hallmark | -0.409 | -1.847 | 0.000     | 0.001     |
| SCHUETZ_BREAST_CANCER_DUCTAL_INVASIVE_UP                                                  | C2       | -0.727 | -3.474 | 0.000     | 0.000     |
| MCLACHLAN_DENTAL_CARIES_UP                                                                | C2       | -0.758 | -3.471 | 0.000     | 0.000     |
| REACTOME_CREATION_OF_C4_AND_C2_ACTIVATORS                                                 | C2       | -0.883 | -3.320 | 0.000     | 0.000     |
| REACTOME_SCAVENGING_OF_HEME_FROM_PLASMA                                                   | C2       | -0.895 | -3.305 | 0.000     | 0.000     |
| POOLA_INVASIVE_BREAST_CANCER_UP                                                           | C2       | -0.707 | -3.305 | 0.000     | 0.000     |
| REACTOME_INITIAL_TRIGGERING_OF_COMPLEMENT                                                 | C2       | -0.856 | -3.300 | 0.000     | 0.000     |
| REACTOME_ROLE_OF_LAT2_NTAL_LAB_ON_CALCIIUM_MOBILIZATION                                   | C2       | -0.895 | -3.290 | 0.000     | 0.000     |
| REACTOME_BINDING_AND_UPTAKE_OF_LIGANDS_BY_SCAVENGER_RECEPTORS                             | C2       | -0.835 | -3.287 | 0.000     | 0.000     |
| REACTOME_FCGR_ACTIVATION                                                                  | C2       | -0.880 | -3.252 | 0.000     | 0.000     |
| REACTOME_ROLE_OF_PHOSPHOLIPIDS_IN_PHAGOCYTOSIS                                            | C2       | -0.844 | -3.240 | 0.000     | 0.000     |
| REACTOME_ANTIGEN_ACTIVATES_B_CELL_RECEPTOR_BCR_LEADING_TO_GENERATION_OF_SECOND_MESSENGERS | C2       | -0.829 | -3.221 | 0.000     | 0.000     |
| REACTOME_CD22_MEDIATED_BCR_REGULATION                                                     | C2       | -0.907 | -3.217 | 0.000     | 0.000     |
| REACTOME_IMMUNOREGULATORY_INTERACTIONS_BETWEEN_A_LYMPHOID_AND_A_NON_LYMPHOID_CELL         | C2       | -0.744 | -3.216 | 0.000     | 0.000     |
| CHIANG_LIVER_CANCER_SUBCLASS_CTNNB1_DN                                                    | C2       | -0.736 | -3.191 | 0.000     | 0.000     |
| REACTOME_FCERI_MEDIATED_MAPK_ACTIVATION                                                   | C2       | -0.811 | -3.188 | 0.000     | 0.000     |
| REACTOME_FCERI_MEDIATED_NF_KB_ACTIVATION                                                  | C2       | -0.764 | -3.178 | 0.000     | 0.000     |
| BOQUEST_STEM_CELL_UP                                                                      | C2       | -0.693 | -3.161 | 0.000     | 0.000     |
| REACTOME_FCERI_MEDIATED_CAPLUS2_MOBILIZATION                                              | C2       | -0.824 | -3.157 | 0.000     | 0.000     |
| REACTOME_REGULATION_OF_ACTIN_DYNAMICS_FOR_PHAGOCYTOTIC_CUP_FORMATION                      | C2       | -0.770 | -3.119 | 0.000     | 0.000     |
| VECCHI_GASTRIC_CANCER_ADVANCED_VS_EARLY_UP                                                | C2       | -0.708 | -3.104 | 0.000     | 0.000     |
| REACTOME_COMPLEMENT_CASCADE                                                               | C2       | -0.768 | -3.087 | 0.000     | 0.000     |
| SMID_BREAST_CANCER_NORMAL_LIKE_UP                                                         | C2       | -0.627 | -3.072 | 0.000     | 0.000     |
| REACTOME_CELL_SURFACE_INTERACTIONS_AT_THE_VASCULAR_WALL                                   | C2       | -0.696 | -3.036 | 0.000     | 0.000     |
| WALLACE_PROSTATE_CANCER_RACE_UP                                                           | C2       | -0.644 | -2.995 | 0.000     | 0.000     |
| REACTOME_FCGAMMA_RECEPTOR_FCGR_DEPENDENT_PHAGOCYTOSIS                                     | C2       | -0.711 | -2.977 | 0.000     | 0.000     |
| ANASTASSIOU_MULTICANCER_INVASIVENESS_SIGNATURE                                            | C2       | -0.799 | -2.971 | 0.000     | 0.000     |
| NAKAYAMA_SOFT_TISSUE_TUMORS_PCA1_UP                                                       | C2       | -0.765 | -2.948 | 0.000     | 0.000     |
| REACTOME_SIGNALING_BY_THE_B_CELL_RECEPTOR_BCR                                             | C2       | -0.688 | -2.918 | 0.000     | 0.000     |
| HOSHIDA_LIVER_CANCER_SUBCLASS_S1                                                          | C2       | -0.641 | -2.916 | 0.000     | 0.000     |
| MIYAGAWA_TARGETS_OF_EWSR1_ETS_FUSIONS_DN                                                  | C2       | -0.649 | -2.900 | 0.000     | 0.000     |
| ACEVEDO_LIVER_CANCER_WITH_H3K27ME3_UP                                                     | C2       | -0.643 | -2.899 | 0.000     | 0.000     |
| REACTOME_FC_EPSILON_RECEPTOR_FCERI_SIGNALING                                              | C2       | -0.661 | -2.895 | 0.000     | 0.000     |
| CHARAFE_BREAST_CANCER_LUMINAL_VS_MESENCHYMAL_DN                                           | C2       | -0.591 | -2.879 | 0.000     | 0.000     |
| FLECHNER_BIOPSY_KIDNEY_TRANSPLANT_REJECTED_VS_OK_UP                                       | C2       | -0.733 | -2.854 | 0.000     | 0.000     |
| RODWELL_AGING_KIDNEY_UP                                                                   | C2       | -0.586 | -2.838 | 0.000     | 0.000     |



|                                                          |    |        |        |       |       |
|----------------------------------------------------------|----|--------|--------|-------|-------|
| VERHAAK_GLIOBLASTOMA_MESENCHYMAL                         | C2 | -0.628 | -2.830 | 0.000 | 0.000 |
| FARMER_BREAST_CANCER_CLUSTER_1                           | C2 | -0.805 | -2.829 | 0.000 | 0.000 |
| RIGGI_EWING_SARCOMA_PROGENITOR_DN                        | C2 | -0.643 | -2.828 | 0.000 | 0.000 |
| WANG_SMARCE1_TARGETS_UP                                  | C2 | -0.613 | -2.812 | 0.000 | 0.000 |
| PICCALUGA_ANGIOIMMUNOBLASTIC_LYMPHOMA_UP                 | C2 | -0.635 | -2.809 | 0.000 | 0.000 |
| LINDGREN_BLADDER_CANCER_CLUSTER_2B                       | C2 | -0.583 | -2.802 | 0.000 | 0.000 |
| TAKEDA_TARGETS_OF_NUP98_HOXA9_FUSION_8D_DN               | C2 | -0.626 | -2.791 | 0.000 | 0.000 |
| ICHIBA_GRAFT_VERSUS_HOST_DISEASE_35D_UP                  | C2 | -0.661 | -2.789 | 0.000 | 0.000 |
| DELYS_THYROID_CANCER_UP                                  | C2 | -0.575 | -2.781 | 0.000 | 0.000 |
| TURASHVILI_BREAST_LOBULAR_CARCINOMA_VS_DUCTAL_NORMAL_UP  | C2 | -0.727 | -2.780 | 0.000 | 0.000 |
| SMID_BREAST_CANCER_RELAPSE_IN_BONE_DN                    | C2 | -0.590 | -2.773 | 0.000 | 0.000 |
| RASHI_RESPONSE_TO_IONIZING_RADIATION_6                   | C2 | -0.713 | -2.766 | 0.000 | 0.000 |
| RODWELL_AGING_KIDNEY_NO_BLOOD_UP                         | C2 | -0.618 | -2.765 | 0.000 | 0.000 |
| WU_CELL_MIGRATION                                        | C2 | -0.634 | -2.760 | 0.000 | 0.000 |
| KIM_GLIS2_TARGETS_UP                                     | C2 | -0.719 | -2.755 | 0.000 | 0.000 |
| WOO_LIVER_CANCER_RECURRENCE_UP                           | C2 | -0.691 | -2.742 | 0.000 | 0.000 |
| TAKEDA_TARGETS_OF_NUP98_HOXA9_FUSION_10D_DN              | C2 | -0.644 | -2.738 | 0.000 | 0.000 |
| TURASHVILI_BREAST_LOBULAR_CARCINOMA_VS_LOBULAR_NORMAL_DN | C2 | -0.712 | -2.729 | 0.000 | 0.000 |
| OISHI_CHOLANGIOMA_STEM_CELL_LIKE_DN                      | C2 | -0.594 | -2.728 | 0.000 | 0.000 |
| BOYLAN_MULTIPLE_MYELOMA_PCA1_UP                          | C2 | -0.662 | -2.724 | 0.000 | 0.000 |
| PETROVA_ENDOTHELIUM_LYMPHATIC_VS_BLOOD_DN                | C2 | -0.637 | -2.724 | 0.000 | 0.000 |
| JAATINEN_HEMATOPOIETIC_STEM_CELL_DN                      | C2 | -0.602 | -2.722 | 0.000 | 0.000 |
| ONDER_CDH1_TARGETS_2_UP                                  | C2 | -0.591 | -2.707 | 0.000 | 0.000 |
| BOYLAN_MULTIPLE_MYELOMA_C_D_DN                           | C2 | -0.583 | -2.693 | 0.000 | 0.000 |
| LINDVALL_IMMORTALIZED_BY_TERT_DN                         | C2 | -0.709 | -2.692 | 0.000 | 0.000 |
| CROMER_TUMORIGENESIS_UP                                  | C2 | -0.747 | -2.686 | 0.000 | 0.000 |
| TAKEDA_TARGETS_OF_NUP98_HOXA9_FUSION_16D_UP              | C2 | -0.615 | -2.682 | 0.000 | 0.000 |
| RICKMAN_HEAD_AND_NECK_CANCER_A                           | C2 | -0.669 | -2.682 | 0.000 | 0.000 |
| CHEBOTAEV_GR_TARGETS_DN                                  | C2 | -0.644 | -2.670 | 0.000 | 0.000 |
| VERHAAK_AML_WITH_NPM1_MUTATED_DN                         | C2 | -0.578 | -2.654 | 0.000 | 0.000 |
| MCBRYAN_PUBERTAL_BREAST_4_5WK_UP                         | C2 | -0.585 | -2.653 | 0.000 | 0.000 |
| PASINI_SUZ12_TARGETS_DN                                  | C2 | -0.568 | -2.649 | 0.000 | 0.000 |
| SABATES_COLORECTAL_ADENOMA_DN                            | C2 | -0.570 | -2.644 | 0.000 | 0.000 |
| CLASPER_LYMPHATIC_VESSELS_DURING_METASTASIS_DN           | C2 | -0.800 | -2.643 | 0.000 | 0.000 |
| CERVERA_SDHB_TARGETS_1_UP                                | C2 | -0.646 | -2.628 | 0.000 | 0.000 |
| THUM_SYSTOLIC_HEART_FAILURE_UP                           | C2 | -0.547 | -2.624 | 0.000 | 0.000 |
| CHARAFE_BREAST_CANCER_LUMINAL_VS_BASAL_DN                | C2 | -0.542 | -2.623 | 0.000 | 0.000 |
| VECCHI_GASTRIC_CANCER_EARLY_DN                           | C2 | -0.550 | -2.614 | 0.000 | 0.000 |
| SENESE_HDAC1_AND_HDAC2_TARGETS_DN                        | C2 | -0.580 | -2.608 | 0.000 | 0.000 |
| SERVITJA_ISLET_HNF1A_TARGETS_UP                          | C2 | -0.600 | -2.594 | 0.000 | 0.000 |
| CHICAS_RB1_TARGETS_GROWING                               | C2 | -0.562 | -2.582 | 0.000 | 0.000 |
| CHIARADONNA_NEOPLASTIC_TRANSFORMATION_CDC25_UP           | C2 | -0.627 | -2.581 | 0.000 | 0.000 |
| WIELAND_UP_BY_HBV_INFECTION                              | C2 | -0.640 | -2.579 | 0.000 | 0.000 |
| NABA_CORE_MATRISOME                                      | C2 | -0.562 | -2.579 | 0.000 | 0.000 |
| GRUETZMANN_PANCREATIC_CANCER_UP                          | C2 | -0.542 | -2.576 | 0.000 | 0.000 |
| LIM_MAMMARY_STEM_CELL_UP                                 | C2 | -0.532 | -2.575 | 0.000 | 0.000 |
| LIAN_LIPA_TARGETS_3M                                     | C2 | -0.688 | -2.566 | 0.000 | 0.000 |
| BOQUEST_STEM_CELL_CULTURED_VS_FRESH_UP                   | C2 | -0.531 | -2.556 | 0.000 | 0.000 |
| RIGGI_EWING_SARCOMA_PROGENITOR_UP                        | C2 | -0.525 | -2.548 | 0.000 | 0.000 |
| SWEET_LUNG_CANCER_KRAS_DN                                | C2 | -0.535 | -2.543 | 0.000 | 0.000 |
| ALTEMEIER_RESPONSE_TO_LPS_WITH_MECHANICAL_VENTILATION    | C2 | -0.613 | -2.538 | 0.000 | 0.000 |
| HOELZEL_NF1_TARGETS_UP                                   | C2 | -0.598 | -2.537 | 0.000 | 0.000 |
| REN_ALVEOLAR_RHABDOMYOSARCOMA_DN                         | C2 | -0.529 | -2.536 | 0.000 | 0.000 |

|                                                        |    |        |        |       |       |
|--------------------------------------------------------|----|--------|--------|-------|-------|
| NADLER_OBESITY_UP                                      | C2 | -0.700 | -2.532 | 0.000 | 0.000 |
| GAUSSMANN_MLL_AF4_FUSION_TARGETS_E_UP                  | C2 | -0.635 | -2.531 | 0.000 | 0.000 |
| COWLING_MYCN_TARGETS                                   | C2 | -0.745 | -2.529 | 0.000 | 0.000 |
| RICKMAN_HEAD_AND_NECK_CANCER_D                         | C2 | -0.758 | -2.525 | 0.000 | 0.000 |
| MARKEY_RB1_ACUTE_LOF_DN                                | C2 | -0.557 | -2.520 | 0.000 | 0.000 |
| TAKEDA_TARGETS_OF_NUP98_HOXA9_FUSION_10D_UP            | C2 | -0.568 | -2.517 | 0.000 | 0.000 |
| REACTOME_INTERLEUKIN_10_SIGNALING                      | C2 | -0.741 | -2.514 | 0.000 | 0.000 |
| SENESE_HDAC2_TARGETS_DN                                | C2 | -0.613 | -2.514 | 0.000 | 0.000 |
| VART_KSHV_INFECTION_ANGIOGENIC_MARKERS_UP              | C2 | -0.580 | -2.514 | 0.000 | 0.000 |
| NABA_ECM_GLYCOPROTEINS                                 | C2 | -0.577 | -2.512 | 0.000 | 0.000 |
| LENAOUR_DENDRITIC_CELL_MATURATION_DN                   | C2 | -0.591 | -2.510 | 0.000 | 0.000 |
| GAURNIER_PSMD4_TARGETS                                 | C2 | -0.667 | -2.508 | 0.000 | 0.000 |
| CHIANG_LIVER_CANCER_SUBCLASS_PROLIFERATION_UP          | C2 | -0.569 | -2.504 | 0.000 | 0.000 |
| REACTOME_CHEMOKINE_RECEPTORS_BIND_CHEMOKINES           | C2 | -0.715 | -2.500 | 0.000 | 0.000 |
| HADDAD_T_LYMPHOCYTE_AND_NK_PROGENITOR_DN               | C2 | -0.672 | -2.500 | 0.000 | 0.000 |
| LIM_MAMMARY_LUMINAL_MATURE_DN                          | C2 | -0.641 | -2.499 | 0.000 | 0.000 |
| LEE_NEURAL_CREST_STEM_CELL_UP                          | C2 | -0.585 | -2.498 | 0.000 | 0.000 |
| RUTELLA_RESPONSE_TO_HGF_VS_CSF2RB_AND_IL4_UP           | C2 | -0.521 | -2.497 | 0.000 | 0.000 |
| LENAOUR_DENDRITIC_CELL_MATURATION_UP                   | C2 | -0.603 | -2.496 | 0.000 | 0.000 |
| LIU_VAV3_PROSTATE_CARCINOGENESIS_UP                    | C2 | -0.634 | -2.487 | 0.000 | 0.000 |
| WINTER_HYPOXIA_DN                                      | C2 | -0.709 | -2.486 | 0.000 | 0.000 |
| ONDER_CDH1_TARGETS_2_DN                                | C2 | -0.512 | -2.482 | 0.000 | 0.000 |
| WAMUNYOKOLI_OVARIAN_CANCER_LMP_DN                      | C2 | -0.556 | -2.480 | 0.000 | 0.000 |
| STEGER_ADIPOGENESIS_DN                                 | C2 | -0.806 | -2.479 | 0.000 | 0.000 |
| CHANDRAN_METASTASIS_DN                                 | C2 | -0.534 | -2.478 | 0.000 | 0.000 |
| ANDERSEN_CHOLANGIOCARCINOMA_CLASS2                     | C2 | -0.573 | -2.474 | 0.000 | 0.000 |
| AZARE_NEOPLASTIC_TRANSFORMATION_BY_STAT3_UP            | C2 | -0.588 | -2.468 | 0.000 | 0.000 |
| HUANG_GATA2_TARGETS_UP                                 | C2 | -0.574 | -2.464 | 0.000 | 0.000 |
| PLASARI_TGFB1_TARGETS_10HR_DN                          | C2 | -0.538 | -2.464 | 0.000 | 0.000 |
| LIAN_LIPA_TARGETS_6M                                   | C2 | -0.645 | -2.463 | 0.000 | 0.000 |
| RUTELLA_RESPONSE_TO_HGF_UP                             | C2 | -0.512 | -2.456 | 0.000 | 0.000 |
| CAIRO_LIVER_DEVELOPMENT_UP                             | C2 | -0.571 | -2.454 | 0.000 | 0.000 |
| HUPER_BREAST_BASAL_VS_LUMINAL_UP                       | C2 | -0.690 | -2.448 | 0.000 | 0.000 |
| DAVICIONI_TARGETS_OF_PAX_FOXO1_FUSIONS_UP              | C2 | -0.530 | -2.444 | 0.000 | 0.000 |
| BRUECKNER_TARGETS_OF_MIRLET7A3_DN                      | C2 | -0.647 | -2.437 | 0.000 | 0.000 |
| TONKS_TARGETS_OF_RUNX1_RUNX1T1_FUSION_ERYTHROCYTE_UP   | C2 | -0.561 | -2.436 | 0.000 | 0.000 |
| KAAB_HEART_ATRIUM_VS_VENTRICLE_UP                      | C2 | -0.529 | -2.430 | 0.000 | 0.000 |
| CHYLA_CBFA2T3_TARGETS_UP                               | C2 | -0.511 | -2.427 | 0.000 | 0.000 |
| PETROVA_PROX1_TARGETS_DN                               | C2 | -0.668 | -2.427 | 0.000 | 0.000 |
| ZHENG_BOUND_BY_FOXP3                                   | C2 | -0.495 | -2.426 | 0.000 | 0.000 |
| OSADA_ASCL1_TARGETS_DN                                 | C2 | -0.806 | -2.424 | 0.000 | 0.000 |
| WESTON_VEGFA_TARGETS                                   | C2 | -0.604 | -2.422 | 0.000 | 0.000 |
| MOHANKUMAR_HOXA1_TARGETS_DN                            | C2 | -0.566 | -2.421 | 0.000 | 0.000 |
| THUM_MIR21_TARGETS_HEART_DISEASE_UP                    | C2 | -0.872 | -2.421 | 0.000 | 0.000 |
| LIU_PROSTATE_CANCER_DN                                 | C2 | -0.494 | -2.410 | 0.000 | 0.000 |
| HUANG_DASATINIB_RESISTANCE_UP                          | C2 | -0.612 | -2.407 | 0.000 | 0.000 |
| QI_PLASMACYTOMA_UP                                     | C2 | -0.521 | -2.405 | 0.000 | 0.000 |
| TONKS_TARGETS_OF_RUNX1_RUNX1T1_FUSION_HSC_DN           | C2 | -0.542 | -2.403 | 0.000 | 0.000 |
| CHIANG_LIVER_CANCER_SUBCLASS_INTERFERON_UP             | C2 | -0.792 | -2.403 | 0.000 | 0.000 |
| TURASHVILI_BREAST_DUCTAL_CARCINOMA_VS_DUCTAL_NORMAL_UP | C2 | -0.696 | -2.395 | 0.000 | 0.000 |
| CHIANG_LIVER_CANCER_SUBCLASS_UNANNOTATED_DN            | C2 | -0.537 | -2.395 | 0.000 | 0.000 |
| LINDSTEDT_DENDRITIC_CELL_MATURATION_A                  | C2 | -0.648 | -2.388 | 0.000 | 0.000 |
| ONDER_CDH1_SIGNALING_VIA_CTNNB1                        | C2 | -0.608 | -2.385 | 0.000 | 0.000 |

|                                                         |    |        |        |       |       |
|---------------------------------------------------------|----|--------|--------|-------|-------|
| IZADPANAH_STEM_CELL_ADIPOSE_VS_BONE_DN                  | C2 | -0.587 | -2.383 | 0.000 | 0.000 |
| VANTVEER_BREAST_CANCER_ESR1_DN                          | C2 | -0.517 | -2.382 | 0.000 | 0.000 |
| WESTON_VEGFA_TARGETS_6HR                                | C2 | -0.672 | -2.378 | 0.000 | 0.000 |
| KEGG_TYPE_I_DIABETES_MELLITUS                           | C2 | -0.714 | -2.376 | 0.000 | 0.000 |
| DURAND_STROMA_S_UP                                      | C2 | -0.512 | -2.376 | 0.000 | 0.000 |
| HELLEBREKERS_SILENCED_DURING_TUMOR_ANGIOGENESIS         | C2 | -0.612 | -2.370 | 0.000 | 0.000 |
| REACTOME_ELASTIC_FIBRE_FORMATION                        | C2 | -0.693 | -2.370 | 0.000 | 0.000 |
| MARKEY_RB1_CHRONIC_LOF_DN                               | C2 | -0.586 | -2.370 | 0.000 | 0.000 |
| TURASHVILI_BREAST_DUCTAL_CARCINOMA_VS_LOBULAR_NORMAL_DN | C2 | -0.629 | -2.365 | 0.000 | 0.000 |
| KEGG_HEMATOPOIETIC_CELL_LINEAGE                         | C2 | -0.617 | -2.364 | 0.000 | 0.000 |
| WU_SILENCED_BY_METHYLATION_IN_BLADDER_CANCER            | C2 | -0.661 | -2.361 | 0.000 | 0.000 |
| RUTELLA_RESPONSE_TO_CSF2RB_AND_IL4_DN                   | C2 | -0.505 | -2.358 | 0.000 | 0.000 |
| WILENSKY_RESPONSE_TO_DARAPLADIB                         | C2 | -0.753 | -2.356 | 0.000 | 0.000 |
| ZHENG_IL22_SIGNALING_UP                                 | C2 | -0.662 | -2.354 | 0.000 | 0.000 |
| KEGG_CYTOKINE_CYTOKINE_RECEPTOR_INTERACTION             | C2 | -0.519 | -2.349 | 0.000 | 0.000 |
| RICKMAN_HEAD_AND_NECK_CANCER_B                          | C2 | -0.677 | -2.349 | 0.000 | 0.000 |
| LAIHO_COLORECTAL_CANCER_SERRATED_UP                     | C2 | -0.586 | -2.343 | 0.000 | 0.000 |
| ICHIBA_GRAFT_VERSUS_HOST_DISEASE_D7_UP                  | C2 | -0.576 | -2.342 | 0.000 | 0.000 |
| ROSS_AML_WITH_CFBF_MYH11_FUSION                         | C2 | -0.660 | -2.341 | 0.000 | 0.000 |
| KIM_LIVER_CANCER_POOR_SURVIVAL_UP                       | C2 | -0.800 | -2.338 | 0.000 | 0.000 |
| BEGUM_TARGETS_OF_PAX3_FOXO1_FUSION_UP                   | C2 | -0.633 | -2.335 | 0.000 | 0.000 |
| SCHAEFFER_PROSTATE_DEVELOPMENT_48HR_DN                  | C2 | -0.490 | -2.333 | 0.000 | 0.000 |
| WANG_MLL_TARGETS                                        | C2 | -0.502 | -2.333 | 0.000 | 0.000 |
| WINZEN_DEGRADED_VIA_KHSRP                               | C2 | -0.590 | -2.331 | 0.000 | 0.000 |
| LEE_LIVER_CANCER_SURVIVAL_DN                            | C2 | -0.543 | -2.329 | 0.000 | 0.000 |
| IGLESIAS_E2F_TARGETS_UP                                 | C2 | -0.550 | -2.329 | 0.000 | 0.000 |
| CROONQUIST_NRAS_SIGNALING_UP                            | C2 | -0.694 | -2.327 | 0.000 | 0.000 |
| PAPASPYRIDONOS_UNSTABLE_ATEROSCLEROTIC_PLAQUE_DN        | C2 | -0.677 | -2.327 | 0.000 | 0.000 |
| VERHAAK_AML_WITH_NPM1_MUTATED_UP                        | C2 | -0.531 | -2.326 | 0.000 | 0.000 |
| GRAHAM_CML_DIVIDING_VS_NORMAL QUIESCENT_DN              | C2 | -0.585 | -2.325 | 0.000 | 0.000 |
| REACTOME_EXTRACELLULAR_MATRIX_ORGANIZATION              | C2 | -0.500 | -2.321 | 0.000 | 0.000 |
| LEE_LIVER_CANCER_DENA_UP                                | C2 | -0.625 | -2.316 | 0.000 | 0.000 |
| RHEIN_ALL_GLUCOCORTICOID_THERAPY_UP                     | C2 | -0.614 | -2.313 | 0.000 | 0.000 |
| LU_IL4_SIGNALING                                        | C2 | -0.586 | -2.312 | 0.000 | 0.000 |
| ZHU_CMV_24_HR_DN                                        | C2 | -0.589 | -2.311 | 0.000 | 0.000 |
| KLEIN_PRIMARY EFFUSION LYMPHOMA_DN                      | C2 | -0.647 | -2.310 | 0.000 | 0.000 |
| CROONQUIST_STROMAL_STIMULATION_UP                       | C2 | -0.635 | -2.309 | 0.000 | 0.000 |
| KUROZUMI_RESPONSE_TO_ONCOCYTIC_VIRUS                    | C2 | -0.680 | -2.308 | 0.000 | 0.000 |
| TAKEDA_TARGETS_OF_NUP98_HOXA9_FUSION_6HR_UP             | C2 | -0.584 | -2.308 | 0.000 | 0.000 |
| LI_INDUCED_T_TO_NATURAL_KILLER_UP                       | C2 | -0.496 | -2.305 | 0.000 | 0.000 |
| DACOSTA_ERCC3_ALLELE_XPCS_VS_TTD_DN                     | C2 | -0.723 | -2.304 | 0.000 | 0.000 |
| BOSCO_TH1_CYTOTOXIC_MODULE                              | C2 | -0.561 | -2.304 | 0.000 | 0.000 |
| VERRECCHIA_EARLY_RESPONSE_TO_TGFB1                      | C2 | -0.643 | -2.303 | 0.000 | 0.000 |
| PEDERSEN_METASTASIS_BY_ERBB2_ISOFORM_4                  | C2 | -0.565 | -2.302 | 0.000 | 0.000 |
| REACTOME_PHOSPHORYLATION_OF_CD3_AND_TCR_ZETA_CHAINS     | C2 | -0.782 | -2.302 | 0.000 | 0.000 |
| CUI_TCF21_TARGETS_UP                                    | C2 | -0.720 | -2.300 | 0.000 | 0.000 |
| SUNG_METASTASIS_STROMA_UP                               | C2 | -0.560 | -2.300 | 0.000 | 0.000 |
| LIAO_HAVE_SOX4_BINDING_SITES                            | C2 | -0.669 | -2.299 | 0.000 | 0.000 |
| DIAZ_CHRONIC_MEYLOGENOUS_LEUKEMIA_DN                    | C2 | -0.572 | -2.297 | 0.000 | 0.000 |

**Supplementary Table 24.** Clinico-pathological characteristics of the Mongolian gene expression-based clusters in the Mongolian NCI cohort.

|                                   | <b>MGL1</b><br>(n=34, 49%) | <b>MGL2</b><br>(n=18, 26%) | <b>MGL3</b><br>(n=18, 26%) | <b>p value</b> |
|-----------------------------------|----------------------------|----------------------------|----------------------------|----------------|
| Age (years)                       | 62 (41-76)                 | 56.5 (45-77)               | 59 (23-68)                 | 0.19           |
| <60 years old (n, %)              | 13 (38.2)                  | 10 (55.6)                  | 9 (50.0)                   | 0.546          |
| Gender (male, %)                  | 21 (61.7)                  | 8 (44.4)                   | 8 (44.4)                   | 0.45           |
| BMI > 25 kg/m <sup>2</sup> (n, %) | 13 (38.2)                  | 6 (33.3)                   | 7 (38.9)                   | 0.83           |
| Viral infection:                  |                            |                            |                            |                |
| HBV + (n, %)                      | 22 (64.7)                  | 14 (77.8)                  | 13 (72.2)                  | 0.804          |
| HDV + (n, %)                      | 14 (41.2)                  | 5 (27.8)                   | 8 (44.4)                   | 0.626          |
| HCV + (n, %)                      | 23 (67.6)                  | 10 (55.6)                  | 8 (44.4)                   | 0.473          |
| AFP >20 IU/ml (n, %)              | 10 (29.4)                  | 10 (55.6)                  | 5 (27.8)                   | 0.023          |
| Liver cirrhosis (F4, %)           | 14 (41.2)                  | 9 (50.0)                   | 5 (27.8)                   | 0.135          |

BMI, body mass index; HBV, hepatitis B virus; HCV, hepatitis C virus; HDV, hepatitis delta virus; AFP, alfa-fetoprotein
